# Supplementary material for: Genome-wide identification and expression analysis of auxin response factors in peanut (Arachis hypogaea L.)
Source: PeerJ journal article supplement (doi:10.7717/peerj.12319), 2021-10-21

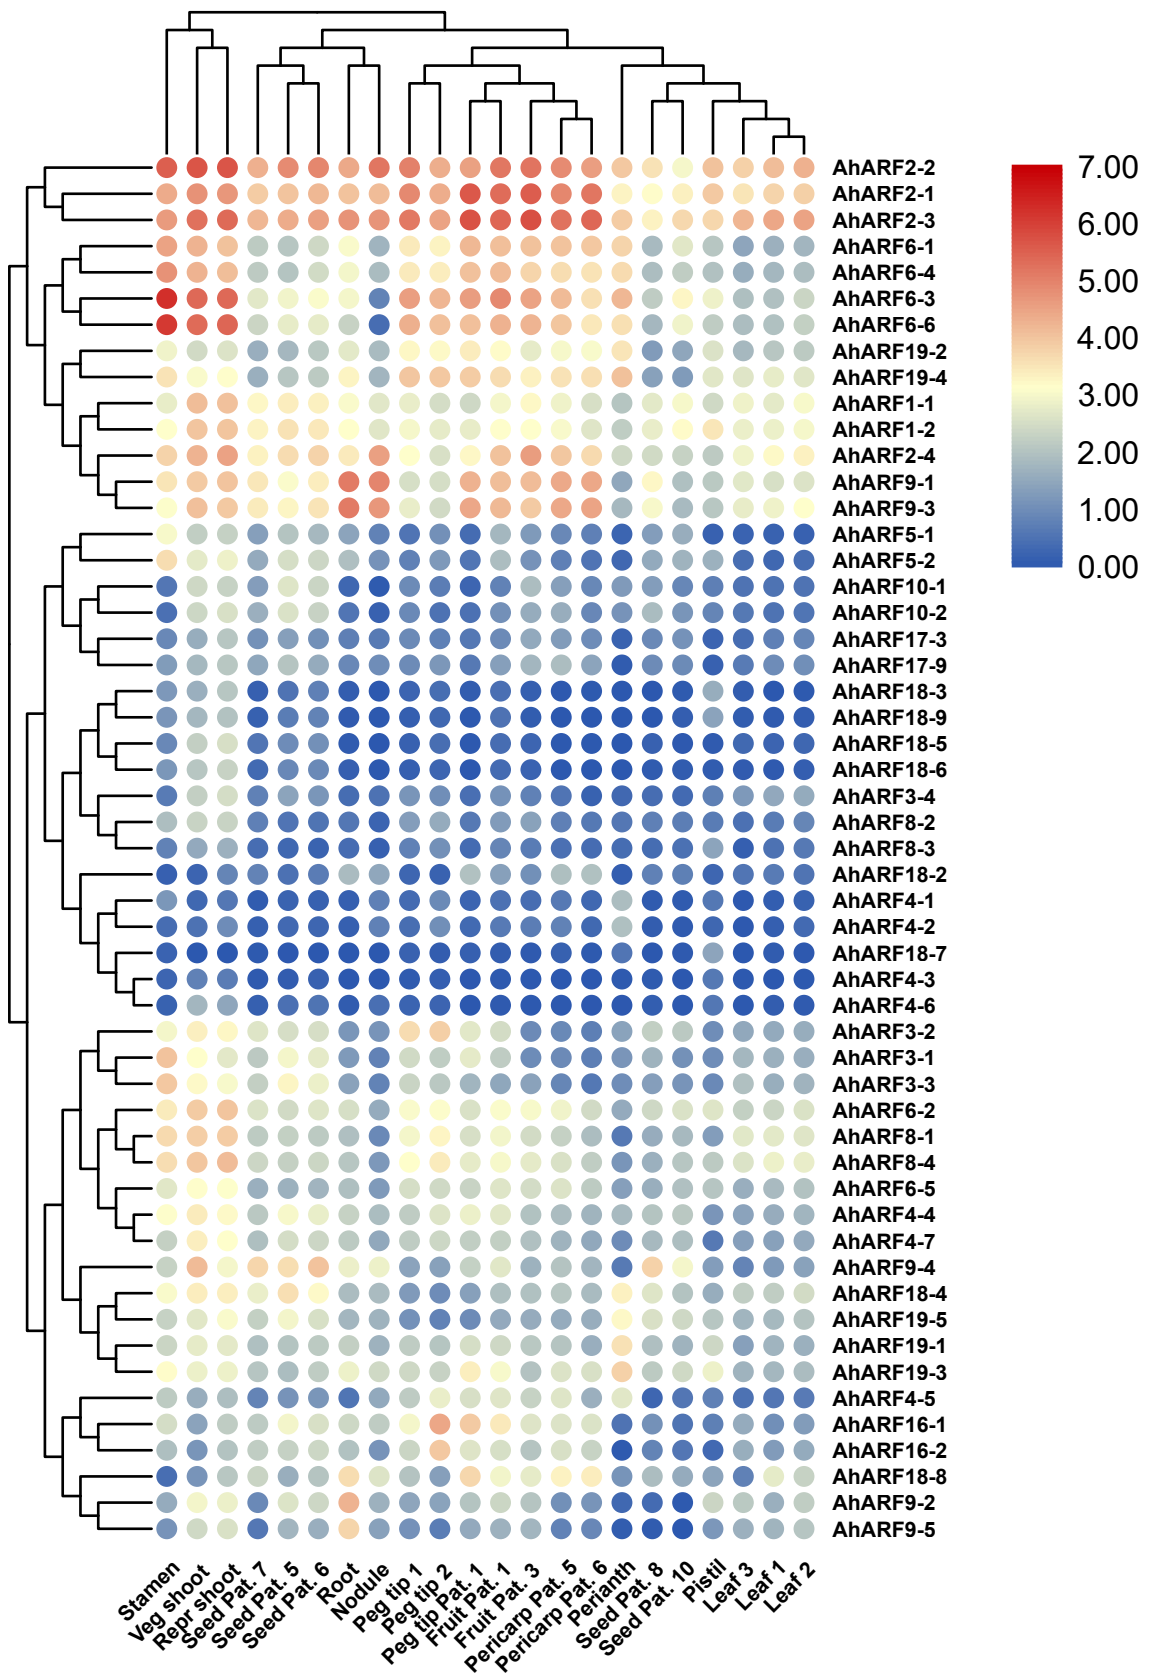

Supplement: Additional_file_1_Figure_S1.pdf [file Additional_file_1_Figure_S1.pdf]
