# Supplementary material for: Genome-wide identification and expression analysis of auxin response factors in peanut (Arachis hypogaea L.)
Source: PeerJ journal article supplement (doi:10.7717/peerj.12319), 2021-10-21

**AhARF 6-1**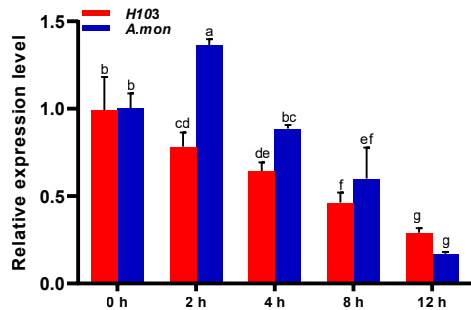**AhARF 6-2**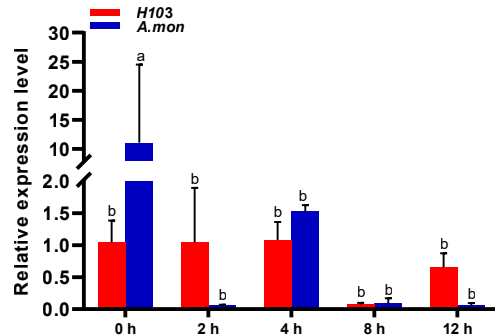**AhARF 6-3**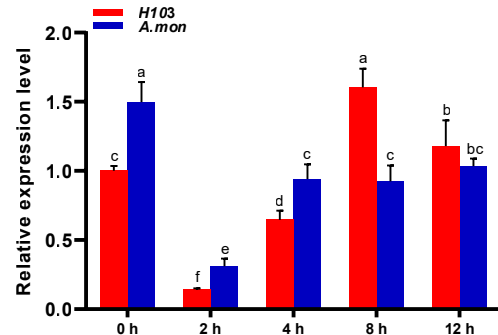**AhARF 6-4**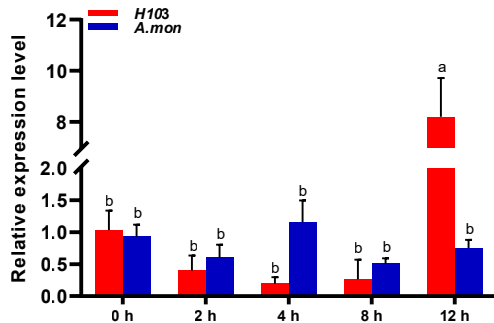**AhARF 6-5**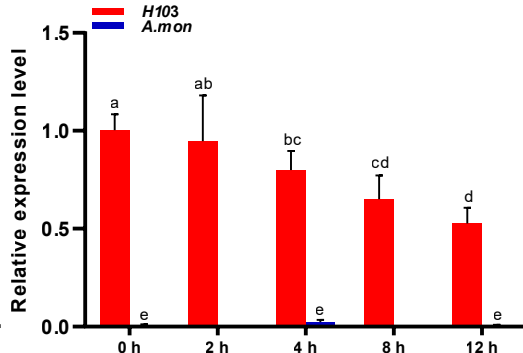**AhARF 6-6**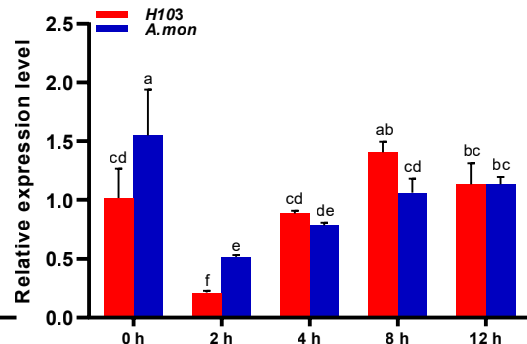

Supplement: Additional_file_1_Figure_S3.pdf [file Additional_file_1_Figure_S3.pdf]
