# Supplementary material for: Genome-wide identification and expression analysis of auxin response factors in peanut (Arachis hypogaea L.)
Source: PeerJ. 2021 Oct 21;9:e12319. doi: 10.7717/peerj.12319 (PMC8542371; doi:10.7717/peerj.12319)
Supplement: Supplemental Information 4 [file peerj-09-12319-s004.xlsx]

## Sheet: S1
Table S1 Information of AhARF genes
Gene	Starting position	Ending position	chromosome	Length	CDS length	Amino acids length
AhARF1-1	3210824	3216085	chrom04	5261	1974	658
AhARF1-2	4542419	4547646	chrom14	5227	1974	658
AhARF2-1	116294519	116300104	chrom03	5585	1152	384
AhARF2-2	50001495	50007503	chrom08	6008	2592	864
AhARF2-3	118553284	118558886	chrom13	5602	2547	849
AhARF2-4	133984380	133990418	chrom18	6038	2484	828
AhARF3-1	128717829	128723402	chrom03	5573	2097	699
AhARF3-2	1990585	1997061	chrom10	6476	2202	734
AhARF3-3	131189413	131194892	chrom13	5479	2112	704
AhARF3-4	4111347	4117372	chrom20	6025	2022	674
AhARF4-1	1966970	1973209	chrom03	6239	2700	900
AhARF4-2	1989333	1995575	chrom03	6242	2829	943
AhARF4-3	9066209	9078648	chrom06	12439	2094	698
AhARF4-4	28409812	28416517	chrom08	6705	2418	806
AhARF4-5	3675468	3681602	chrom13	6134	2472	824
AhARF4-6	10728298	10735524	chrom16	7226	2058	686
AhARF4-7	4159776	4166467	chrom18	6691	2418	806
AhARF5-1	18920589	18929053	chrom06	8464	2991	997
AhARF5-2	767716	775091	chrom16	7375	2793	931
AhARF6-1	141378819	141385566	chrom03	6747	2655	885
AhARF6-2	3453937	3459953	chrom07	6016	2769	923
AhARF6-3	652394	658805	chrom10	6411	2430	810
AhARF6-4	144309619	144316317	chrom13	6698	2727	909
AhARF6-5	5451611	5460855	chrom17	9244	2706	902
AhARF6-6	2017414	2023492	chrom20	6078	2514	838
AhARF8-1	15068382	15076250	chrom07	7868	2571	857
AhARF8-2	20284277	20291923	chrom12	7646	2622	874
AhARF8-3	20339994	20345937	chrom12	5943	1983	661
AhARF8-4	18935909	18943804	chrom17	7895	2571	857
AhARF9-1	82821205	82827370	chrom02	6165	2067	689
AhARF9-2	2295862	2299796	chrom06	3934	2118	706
AhARF9-3	96759870	96766284	chrom12	6414	2067	689
AhARF9-4	98830358	98835328	chrom14	4970	2016	672
AhARF9-5	22912943	22917489	chrom16	4546	2130	710
AhARF10-1	1610947	1614946	chrom03	3999	2097	699
AhARF10-2	3391202	3395370	chrom13	4168	2106	702
AhARF16-1	118837159	118839175	chrom09	2016	1668	556
AhARF16-2	146576386	146578946	chrom19	2560	1731	577
AhARF17-1	88593769	88596522	chrom02	2753	1689	563
AhARF17-2	11881702	11883727	chrom08	2025	1668	556
AhARF17-3	54178262	54183430	chrom10	5168	1770	590
AhARF17-4	103071221	103074151	chrom12	2930	1722	574
AhARF17-5	128431562	128433637	chrom17	2075	1698	566
AhARF17-6	128447665	128449776	chrom17	2111	1701	567
AhARF17-7	128478381	128480445	chrom17	2064	1704	568
AhARF17-8	128495660	128497721	chrom17	2061	1680	560
AhARF17-9	74746887	74751028	chrom20	4141	1770	590
AhARF18-1	102605311	102609071	chrom02	3760	2109	703
AhARF18-2	115265542	115271751	chrom05	6209	1023	341
AhARF18-3	612803	617811	chrom06	5008	1479	493
AhARF18-4	28777661	28782036	chrom08	4375	2175	725
AhARF18-5	49399508	49404698	chrom08	5190	1740	580
AhARF18-6	4994208	4999588	chrom12	5380	1737	579
AhARF18-7	120203236	120206996	chrom12	3760	2109	703
AhARF18-8	160314209	160317445	chrom15	3236	1749	583
AhARF18-9	29525617	29530910	chrom16	5293	1656	552
AhARF19-1	51229968	51238503	chrom03	8535	3411	1137
AhARF19-2	94093951	94101641	chrom05	7690	3372	1124
AhARF19-3	53071635	53080147	chrom13	8512	3411	1137
AhARF19-4	151396626	151404293	chrom15	7667	3342	1114
AhARF19-5	4500453	4504722	chrom18	4269	2175	725
						1137
						341

## Sheet: S2
Table S2 Description of 22 tissues in A. hypogaea Tifrunner (Clevenger et al. 2016).
	Tissue	Stage/description	Library reps
1	seedling leaf	10 d post-emergence; leaflets partially open	3
2	main stem leaf	Growth stage Boote R1 – first flower; leaflets partially open, from main stem (n)	3
3	lateral stem leaf	Growth stage Boote R1 – first flower; leaflets partially open, from laterals (n+1)	3
4	vegetative shoot tip	Growth stage Boote R1 – first flower, from mainstem (n); 5 mm maxium length	3
5	reproductive shoot tip	Growth stage Boote R1 – first flower, from laterals (n+1); 5 mm maxium length	3
6	root	10 d post-emergence	3
7	nodules	25 d post-emergence	3
8	perianth	Fully open, morning of anthesis; wings, banner, hypanthium, keel and lower lip of the calyx	3
9	gynoecium	Fully open, morning of anthesis; stigma, style and overy	3
10	androecium	Fully open, morning of anthesis; staminal tube, filaments and anthers	2
11	aerial gynophore tip	5 mm (=mostly ovary and zone of cell division) from elongating peg prior to soil penetration	3
12	subterranean gynophore tip	5 mm (=mostly ovary and zone of cell division) from elongating peg of approximately same length as #9, but 24 h after soil penetration	3
13	Pattee 1 pod	Whole pod at pod swelling (Pattee stage 1)	2
14	Pattee 1 stalk	Gynophore stalk at pod swelling (Pattee stage 1)	2
15	Pattee 3 pod	Pericarp very watery, embryo very small and not easily removed (Pattee stage 3/4)	3
16	Pattee 5 pericarp	Pericarp soft, not as watery, inner pericarp without cracks (Pattee stage 5)	3
17	Pattee 5 seed	Embryo flat, white or just turning pink at one end (Pattee stage 5)	2
18	Pattee 6 pericarp	Inner pericarp tissue beginning to show cracks or cottony (Pattee stage 6/7)	3
19	Pattee 6 seed	Torpedo shaped; generally pink at embryonic-axis end of kernels (Pattee stage 6)	2
20	Pattee 7 seed	Torpedo to round shaped; embryonic axis end of kernel pink; other end white to light pink (Pattee stage 7)	2
21	Pattee 8 seed	Round, light pink all over (Pattee stage 8)	2
22	Pattee 10 seed	Large, generally dark pink all over; seed coat beginning to dry out (Pattee stage 10)	2

## Sheet: S3
	Table S3 Six pairs of primers of AhARF6-5.
	Primer name	Primer sequence(5'--3')	Target segment length	TM
Three pairs of primer	AhARF.A-F-1043	ATGAAGCTTTCTTCCTCTGG	1043bp	55℃
	AhARF.A-R-1043	GACTCTTGGTTGCCTATCTC		55℃
	AhARF.B-F-1101	ATTCCCTTGACCAAGTATGT	1101bp	55℃
	AhARF.B-R-1101	TTCCACCTGAGGCAATAC		55℃
	AhARF.C-F-973	CCCGAGCCAATCAGGAAT	973bp	55℃
	AhARF.C-R-973	CATATAGTGAAGGGACCCCA		55℃
Three pairs of homologous recombination primers	GFP-A-912-F	gtcatgtctTCTGGAGCCTTACTACCGAAGC	912bp	68℃
	GFP-A-912-R	gaagagcatccTAAACCGCATACCAACAGAAACTC
	GFP-B-973-F	tgcggtttaGGATGCTCTTCGAGACAGAAGAG	973bp	68℃
	GFP-B-973-R	aaggctccagaAGACATGACAGAGTTCGGTCCG
	GFP-C-863-F	gtcatgtctTCTGGAGCCTTACTACCGAAGC	863bp	68℃
	GFP-C-863-R	caccatggtgtcgactctagaCTAATAGTGAAGGGACCCCATTGA

## Sheet: S4
Table S4 Primers of AhARF6 for qRT-PCR.
Primer name	Primer sequence(5'--3')
ARF6.1-F-150	GCTGCGCTTCAGGATATGAG
ARF6.1-R-150	GAAGGCCTGCTGATGTTGAG
ARF6.2-F-114	ATGAAGCTTTCTTCCTCTGGG
ARF6.2-R-114	CTCCCCTACCATGAATGC
ARF6.3-F-200	TGCATCTCAGTGCATTCTGC
ARF6.3-R-200	GAATGGTGGGAGAGTCACCA
ARF6.4-F-109	TTAGACTCTTGTGCAAAACC
ARF6.4-R-109	GTATGACAAAGTCTGATGGG
ARF6.5-F-263	TCCGTTGTCTAATTTTGCAT
ARF6.5-R-263	TTTGCTTCGGTAGTAAGG
ARF6.6-F-176	TGCCGATTCTTCAGGCTTCC
ARF6.6-R-176	GGTCCTCCAGCTCGCCTTCT
Actin-F	ACCATTCCAGAGGCTTATGAGC
Actin-R	AAGGGAGTGACTTGAACTCTCC

## Sheet: S5
Table S5 ARF protein sequence in peanut and Arabidopsis.
>AhARF.6-5
MKLSSSGFNQPAEEEGEKKTLNSELWHACAGPLVSLPLVGSRVVYFPQGHSEQVAASTNREADAHIPNYPNLPPQLICQLHNVTMHADAETDEVYAQMTLQPLNPQEQKDVYLLPAELGTPSKQPTNYFCKTLTASDTSTHGGFSVPRRAAEKVFPPLDYTQQPPAQELIARDLHDNEWKFRHIFRGQPKRHLLTTGWSVFVSAKRLVAGDSVLFIWNEKNQLLLGIRRANRPQTVMPSSVLSSDSMHIGLLAAAAHAAATNSRFTIFYNPRASPSEFVIPLTKYVKAVYHTRVSVGMRFRMLFETEESSVRRYMGTITGISDLDSVRWPNSHWRSVKVGWDESTAGDRQPRVSLWEIEPLTTFPMYPSPFPLRLRRPWPSGLPSLYGLKDGGDMGINS…
>AhARF.17-1
MPRRSPPSSSSPPRPTPIPAKFWRACAGISAHAPVVNSRVYYFPQGHIDQAASQPLNLSPLVYSRPVIPCRVAAVNFFADPNTDEVFLKILLLPVTDGSAQDFLSPAVAAEGSGNGNGDDEKVESYAKILTRSDANNGGGFSVPRFCADLIFPPLNFEEDPPVQTLRITDLHGAVWEFRHIYRGTPRRHLFTSGWSKFVNSKKIISGDTVVFMKDSDGRMFVGIRRNMSPDDGISDGGLDWLSKIVGMDEGEKEKEEEDEEVMMEGFARNGKGRVSSASVAEAMELAAQNKPFEVVYYPSVGWGEFVVKAEDVDVKMNGILCSVGMRVKMARENYDSSRMTWFQGTVSGVTIPGEAQPWSGSPWRMLQITWDESEILKNVSPVSPWQVEFLSGTPSLPQ…
>AhARF.17-2
MPRRSAPSSSLPPRPTPIPAKFWRACAGISAKAPVVNSRVYYFPQGHIDQAASQPRNLSPLVYSRPVIPCRVAAVNYFADPNTDEVFLKILLVPVTDGSAQDFLPPAVAAEGNSGNGIGDDEEVASYAKILTRSDANNGGGFSVPRSCADLVFPPLNFEEDPPVQNLRITDLHGAVWEFRHIYRGTPRRHLFTSGWSKFVNSKKIISGDTVVFMKDSDGRMFVGLRRNMSLDDDIADGGLDWFAAMDEGEGEKEEEEKEEVMTEGFARNGKGRVTSTSVAEAMELAAQNKPFEVVYYPSVSWGEFVVKAEDVDVMINGIPWRVGIRVKMGRENYDSSRMDWFQGTVSGVTVPGKDQPWSGSPWRMLQITWDESEILKNVNPVSPWQVELLSETLLLPQL…
>AhARF.6-6
MRLSSAGFSPPPQEGEKRVLDSELWHACAGPLVSLPAVGSRVVYFPQGHSEQVAVSTNKEVDAHIPNYPSLPPQLICQLHNLTMHADAETDEVYAQMTLQPLNPQEQKEAYLPAELGSPSKQPTNYFCKTLTASDTSTHGGFSVPRRAAEKVFPPLDFSQQPPAQELIARDLHGNEWKFRHIFRGQPKRHLLTTGWSVFVSAKRLVAGDSVLFIWNDKNQLLLGIRRANRPQTVMPSSVLSSDSMHLGLLAAAAHAAATNSRFTIFYNPRASPSEFVIPLAKYVKAVYHTRVSVGMRFRMLDLDAARWPNSHWRSVKVGWDESTAGERQPRVSLWEIEPLTTFPMYPSPFPLRLKRPWPPGLPSFHGLKDEDFGMSSPLMWLRDADRGGLQSLNFQGIG…
>AhARF.6-3
MRLSSAGFSPPPQEGEKRVLDSELWHACAGPLVSLPAVGSRVVYFPQGHSEQVAVSTNKEVDAHIPNYPSLPPQLICQLHNLTMHADAETDEVYAQMTLQPLNPQEQKEAYLPAELGSPSKQPTNYFCKTLTASDTSTHGGFSVPRRAAEKVFPPLDFSQQPPAQELIARDLHGNEWKFRHIFRGQPKRHLLTTGWSVFVSAKRLVAGDSVLFIWNDKNQLLLGIRRANRPQTVMPSSVLSSDSMHLGLLAAAAHAAATNSRFTIFYNPRASPSEFVIPLAKYVKAVYHTRVSVGMRFRIDLDAARWPNSHWRSVKVGWDESTAGERQPRVSLWEIEPLTTFPMYPSPFPLRLKRPWPPGLPSFHGLKDEDFGMSSPLMWLRDADRGGLQSLNFQGIGV…
>AhARF.19-5
MKEAEKSLDPQLWHACAGGMVQMPPVNSKVFYFPQGHAEHAQTNVDLGAPLRVPSFILCRVAQVKFLADPETDEVFTRMSLVPLRNSELDSDDGGVLDANALENSEKPASFAKTLTQSDANNGGGFSVPRYCAETIFPRLDYSAEPPVQTVIAKDVHGEVWKFRHIYRGTPRRHLLTTGWSSFVNQKKLVAGDSIVFLRAENGDLCVGIRRAKRGTGGGSEAPSGWSSGNGSCGLGSYGAFSAFLREETKLLRNGCGNSSPGGGGSGLNGKAKVSPESVREAITLAASNQPFEVVYYPRASTPEFCIKASAVRAAMRIQWSTGMRFKMAFETEDSSRISWFMGTIASVQVVDPIRWPNSPWRLLQVTWDEPDLLHNVKRVSPWLVELVSSMPAINLSPF…
>AhARF.4-1
MDIDLNHAVVVSSEDDDESNVECDKGASSPSPSDSAMSSYLELWHACAGPLTSLPKKGNVVVYFPQGHLEQSSSFSHFTPIDVPNYDLQPQILCRVVNVQLLANKENDEVYTQITLLPQSDELEDKNLEGKEVEEIGGDEEGNGVPPLKPTTHMFCKSLTASDTSTHGGFSVPRELLKIDYKQQRPSQELVAKDLHGVEWRFRHIYRGQPRRHLLTTGWSMFVGQKKLVSGDAVLFLRGENGELRLGIRRAIRPRNGLPGTVIGNQNCYPNFLSSVSDAISTKSMFHVFYSPRYADKTDILYTYFVSASHAPFVVPYQKYVKSINNPVTIGTRFKMTFEMDESPERRCGGGTVIGMSEVDPYRWPKSKWRCLMFCFSLTETMIRWIWLQQQVRWDEDID…
>AhARF.18-7
MITFMESKEKTREAVEKCLDPQLWHACAGGMVQMPQVNTKVYYFPQGHAEHACGPVNFRTCPKVVPPMVPCRVAAVKYMADPETDEVYAKLRLLPLSGNDADYGNDAGVVGGGGIHEPEAQDKPASFAKTLTQSDANNGGGFSVPRYCAETIFPRLDYSADPPVQSILAKDVHGETWKFRHIYRGTPRRHLLTTGWSTFVNHKKLVAGDSIVFLRADNGELCVGIRRAKKGLGGGPEASSGWNPAGGNCPMPYGGFPGFLKEDDMRLLRNGLDTGTRMMGKGKVRPEAVIEAATLAANKQPFEVVYYPRASTPEFCVKASLVEAALQIRWCSGIRFKMAFETEDSSRISWFMGTISSVQVADPLGWPNSPWRLLQVTWDEPDLLQNVRRVSPWLVELVS…
>AhARF.6-4
MKLSSADFCPPPPEGEKRVLDSELWHACAGPLVSLPIVGSRVVYFPQGHSEQVAVSTNREVDAQIPNYPSLPPQLICQLHNVTMHADIETDEVYAQMTLQPLNPQEQKEAYLPAELGTPSKQPTNYFCKTLTASDTSTHGGFSVPRRAAEKVFPPLDFTQQPPAQELIARDLHGNEWKFRHIFRGQPKRHLLTTGWSVFVSAKRLVAGDAVLFIWNEKNQLLLGIRRANRPQPVMPSSVLSSDSMHLGLLAAAAHAAATNSRFTIFYNPRYHLDSCAKPSGHDIVSFLTDDFSFATFNFSACPSDFVIPLAKYVKAVYHTRVSVGMRFRMLFETEESSVRRYMGTITGISDLDPVRWQNSHWRSVKVGWDESTAGEKQPRVSLWEIEPLTTFPMYPSPF…
>AhARF.18-9
MADGAGDDLFKELWRLCAGPLMDVPCVQDRVFYFPQGHIELLPEPTEQELRQMKNQKSPKYDLPSKILCRVIDVKCLAEMETDEVYARITLQPSSDNDPLDPNPICSEKPKQKFYSFCKTLSTSDTSTHGGFSVLRKHANECLPQLDMTMENPTQELVAKDIHGVEWKFKHIYRGHPKRHLLTTGWSAFVAAKKLVVGDSFVFLRGENGQLRVGIRRLNPPQSPTPSSVVSTQNMRLGVIVTASHSVMTSTMFVVYYKPRTSQFIVSLNKYIDTMNNDFKIGMRFKMRHEGEDPLDKRFCGTIVGVGDESREWPNSQWRSLKVQWDEPATMQRPDRVSCWEIEPLVTSPLNMIQPMAKGKRSRHAEASSSGSKESQVATIWHPPHLNGNGNSSQDLKNN…
>AhARF.19-4
MKTQPEPAAVVAVPNPEEKKSINPELWQACAGPLVNLPPAGTHVFYFPQGHSEQVAASLKKDVDGQIPNYPNLPSKLLCLLHSVTLHADPETDEVYAQMTLQPVPSYDKEALLRSDLALKSNKAQPEFFCKQLTASDTSTHGGFSVPRRAAEKIFPPLDYSMQPPAQELVARDLHDNVWTFRHIYRGQPKRHLLTTGWSLFVSGKRLFAGDSVLFIRDEKQQLLLGIRRANRQPANISSSVLSSDSMHIGILAAAAHAAANNSPFTVFYNPRASPSEFVIPLAKYYKAVYSHQISPGMRFRMMFETEDSGTRRYMGTITGISDLDPVRWKNSQWRNLQVGWDESTAGEKRSRVSLWEIEPVTAPFFICPPPFFRAKRPRQPGMPDDDPSDFDNLFKRTM…
>AhARF.10-2
MKEGEKSLDPQLWHACAGSMVQMPQVNSKVFYFPQGHAEHAQTAIDLSTPSLRVPPLIPCRVATVRFMADPETDEVFAKIKLVPLKSSELDQNDNTLEGEVVVENQEKPASFAKTLTQSDANNGGGFSVPRYCAETIFPRLDYSAEPPVQTVVAKDVHGELWKFRHIYRGTPRRHLLTTGWSTFVNQKKLVAGDSVVFLRAENGDLCVGIRRAKRGIGIGIGGGCEGSSLWSSASSGNGNSNGGPYGALSMFLREENNKLLRNSNGRCSYSSSSSSSRVRAEDVVEAVSMAARNQAFEVVYSPRASTPEFCIKASSVSDAMRIQWCSGMRFKMPFETEDSSRISWFMGTVASVQVADPIRWPNSPWRILQVTWDEPDLLQNVKRVSPWLVELVSNMPII…
>AhARF.4-3
MDADGVTASSSPNAADEGVNNYKKDGDELYERVWRACAGECVYIPRVGDKVLYFPQGYLEQVASFTQHQQDGHVDIPVHNLPSKILCRVVFVQLKTEASRDEVFAQVTLLPESKVKLVFALAYLQQDELSSKDTDTAQIPSRSSVYSFSKILTSSDSGAHGGFSIPKRHAYECFPPLVDMTLKPPAQELVARDLHGYDWRFRHIFRGQPRRNLLTSGWSTFLNSKKLAAGDTCIFFRGENGELRIGVRRAMKRQNIASPSASLISAHSMQLGILASASNAVATGSMFTVYHYPRTNPFEFIIPLQRYMKSTQMSYATGTRVQLLLDVEEPRKRYAGTVISIEDFDGIRWPGSEWRSLKVQWDATPHADMHPERVCPWWIEALDCAKQKHIPILPAPKKA…
>AhARF.10-1
MKEGEKTLDPQLWHACAGSMVQMPQVNSKVFYFPQGHAEHAQTAIDLSTPSLRVPPLIPCRVATVRFMADPETDEVFAKIKLVPLKSSELDQNDNTLEGEVVVENQEKPASFAKTLTQSDANNGGGFSVPRYCAETIFPRLDYSAEPPVQTVVAKDVHGELWKFRHIYRGTPRRHLLTTGWSTFVNQKKLVAGDSVVFLRAENGDLCVGIRRAKRGIGIGIGGGCEGSSLWSSASSGNGNSNGGPYGALSMFLREENNKLLRNSNGRCSYSSSSRVRAEDVVEAVSMAARNQAFEVVYSPRASTPEFCIKASSVTDAMRIQWCSGMRFKMPFETEDSSRISWFMGTVASVQVADPIRWPNSPWRILQVTWDEPDLLQNVKRVSPWLVELVSNMPIINIS…
>AhARF.6-1
MKLSSADFCPPPQEGEKRVLDSELWHACAGPLVSLPIVGSRVVYFPQGHSEQVAVSTNREVDAQIPNYPSLPPQLICQLHNVTMHADIETDEVYAQMTLQPLNPQEQKEAYLPAELGTPSKQPTNYFCKTLTASDTSTHGGFSVPRRAAEKVFPPLDFTQQPPAQELIARDLHGNEWKFRHIFRGQPKRHLLTTGWSVFVSAKRLVAGDAVLFIWNEKNQLLLGIRRANRPQPVMPSSVLSSDSMHLGLLAAAAHAAATNSRFTIFYNPRACPSDFVIPLAKYVKAVYHTRVSVGMRFRMLFETEESSVRRYMGTITGISDLDPVRWQNSHWRSVKVGWDESTAGEKQPRVSLWEIEPLTTFPMYPSPFPLRLKRPWPSGLPSFYGMKEDDFGINSSLM…
>AhARF.19-2
MKTQPEPAAVVAVPNPEEKKSINPELWQACAGPLVNLPPAGTHVFYFPQGHSEQVAASLKKDVDGQIPNYPNLPSKLLCLLHSVTLHADPETDEVYAQMTLQPVPSYDKEALLRSDLALKSNKAQPEFFCKQLTASDTSTHGGFSVPRRAAEKIFPPLDYSMQPPAQELVARDLHDNVWTFRHIYRGQPKRHLLTTGWSLFVSGKRLFAGDSVLFIRDEKQQLLLGIRRANRQPANISSSVLSSDSMHIGILAAAAHAAANNSPFTVFYNPRASPSEFVIPLAKYYKAVYSHQISPGMRFRMMFETEDSGTRRYMGTITGISDLDPVRWKNSQWRNLQVGWDESTAGEKRSRVSLWEIEPVTAPFFICPPPFFRAKRPRQPGMPDDDPSDFDNLFKRTM…
>AhARF.18-1
MITFMESKEKTREAVEKCLDPQLWHACAGGMVQMPQVNTKVYYFPQGHAEHACGPVNFRTCPKVVPPMVPCRVAAVKYMADPETDEVYAKLRLLPLSGNDADYGNDAGVVGGGGIHEPEAQDKPASFAKTLTQSDANNGGGFSVPRYCAETIFPRLDYSADPPVQSILAKDVHGETWKFRHIYRGTPRRHLLTTGWSTFVNHKKLVAGDSIVFLRADNGELCVGIRRAKKGLGGGPEASSGWNPAGGNCPMPYGGFPGFLKEDDMRLLRNGLDTGTRMMGKGKVRPEAVIEAATLAANKQPFEVVYYPRASTPEFCVKASLVEAALQIRWCSGIRFKMAFETEDSSRISWFMGTISSVQVADPLGWPNSPWRLLQVTWDEPDLLQNVRRVSPWLVELVS…
>AhARF.5-1
MFKSVESGAALMASLEEKVKTCGVGVVGGQTLVAEMKLLKEMQEHSGVRKTLNSELWHACAGPLVSLPQVGSLVYYFPQGHSEQVAASTRRTATSQIPNYPNLPSQLLCQVQNVTLHADKDTDEIYAQMSLQPLNSEKDVFPISDFGLKHSKHPTEFFCKTLTASDTSTHGGFSVPRRAAEKLFPPLDYTIQPPTQELVVRDLHDNTWTFRHIYRGGGQPKRHLLTTGWSLFVGSKRLRAGDSVLFIRDEKSQLRVGVRRVNRQQTTLPSSVLSADSMHIGVLAAAAHAASNRIPFTIFYNPRACPSEFVIPLAKYRKSVYGTQLSVGMRFGMMFETEESGKRRYMGTIVGISDLDPLRWPGSKWRNIQVEWDEPGCGDKQNRVSVWEIETPESLFIFP…
>AhARF.6-2
MKLSSSGFNQPAEEEGYDVSKFLSVGQNYAVYAFMVGEKKTLNSELWHACAGPLVSLPPVGSRVVYFPQGHSEQVAASTNREADVHIPNYPNLPPQLICQLHNVTMHADAETDEVYAQMTLQPLSPQEQKDVYLLPAELGTPSKQPTNYFCKTLTASDTSTHGGFSVPRRAAEKVFPPLDYTQQPPAQELIARDLHDNEWKFRHIFRGQPKRHLLTTGWSVFVSAKRLVAGDSVLFIWNEKNQLLLGIRRANRPQTVMPSSVLSSDSMHIGLLAAAAHAAATNSRFTIFYNPRASPSEFVIPLTKYVKAVYHTRVSVGMRFRMLFETEESSVRRYMGTITGISDLDSVRWPNSHWRSVKVGWDESTAGDRQPRVSLWEIEPLTTFPMYPSPFPLRLRRP…
>AhARF.8-4
MEILNNMLPTFLMQLVVVQLGGKRVKLDMKLSTSGLPQQGQHEGGEKKCLNSELWHACAGPLVSLPTAGTRVVYFPQGHSEQVAATTNREVDGHIPNYPSLPPQLICQLHNVTMHADVETDEVYAQMTLQPLTPQEQKDTFLPMELGVPSKQPSNYFCKTLTASDTSTHGGFSVPRRAAEKVFPPLDFSQQPPAQELIARDLHDVEWKFRHIFRGQPKRHLLTTGWSVFVSAKRLVAGDSVLFIWNEKNQLLLGIRRANRPQTVMPSSVLSSDSMHIGLLAAAAHAAATNSCFTVFYNPRASPSEFVIPLSKYIKAVYHTRVSVGMRFRMLFETEESSVRRYMGTITGISDLDPVRWPNSHWRSVKVGWDESTAGDRQPRVSLWEIEPLTTFPMYPSLF…
>AhARF.8-1
MEILNNMLPTFLMQLVVVQLGGKRVKLDMKLSTSGLPQQGQHEGGEKKCLNSELWHACAGPLVSLPTAGTRVVYFPQGHSEQVAATTNREVDGHIPNYPSLPPQLICQLHNVTMHADVETDEVYAQMTLQPLTPQEQKDTFLPMELGVPSKQPSNYFCKTLTASDTSTHGGFSVPRRAAEKVFPPLDFSQQPPAQELIARDLHDVEWKFRHIFRGQPKRHLLTTGWSVFVSAKRLVAGDSVLFIWNEKNQLLLGIRRANRPQTVMPSSVLSSDSMHIGLLAAAAHAAATNSCFTVFYNPRASPSEFVIPLSKYIKAVYHTRVSVGMRFRMLFETEESSVRRYMGTITGISDLDPVRWPNSHWRSVKVGWDESTAGDRQPRVSLWEIEPLTTFPMYPSLF…
>AhARF.18-4
MKEAEKSLDPQLWHACAGGMVQMPPVNSKVFYFPQGHAEHAQTNVDLAAPLRVPSFILCRVAQVKFLADPETDEVFTRISLVPLRNSELDSDDGGVLDANGLENSEKPASFAKTLTQSDANNGGGFSVPRYCAETIFPRLDYSAEPPVQTVIAKDVHGEVWKFRHIYRGTPRRHLLTTGWSSFVNQKKLVAGDSIVFLRAENGDLCVGIRRAKRGTGGGSEAPSGWSSGNGSCGLGSYGAFSAFLREETKLLRNGCGNSSPGGGGGGGGLNGKAKVSPESVREAITLAASNQPFEVVYYPRASTPEFCIKASAVRAAMRIQWSTGMRFKMAFETEDSSRISWFMGTIASVQVVDPIRWPNSPWRLLQVTWDEPDLLHNVKRVSPWLVELVSSMPAINLS…
>AhARF.17-5
MPRRSAPSSSLPPRPTPIPAKFWRACAGISAQAPVVNSRVYYFPQGHIDQAASQPQNLSPLVYSRPVIPCRVAAVNYFADPNTDEVFLKILLLPVTNGSAQDFLPPAVAAEGNSGNGNGDDEEVISYAKILTRSDANNGGGFSVPRSCADLVFPPLNFEEDPPVQNLRITDLHGAVWEFRHIYRGTPRRHLFTSGWSKFVNSKKIISGDTVVFMKDSHGRMFVGLRRNMSLEDGISDGGLDWVAAMVGMDEGEKEKEEEEEEAMTQGFARNEKGRVTSTSVAEAMELAAQNKPFEVVYYPSVGWGEFVVKAEKVDAMINGIPWSVGMRVKMGRENYDSSRMDWFQGTVSAVNVPGKDQPWSGSPWRTLQITWDESEILKNVNPVSPWQVELLSETLLLP…
>AhARF.3-2
MGLIDLNTTEEDEAQTPSSASTGSASSPSHSGISTSASALAPPSSSSSVCLELWHACAGPMISLPKKGSVVVYLPQGHFEQAQDFPVTAYNIPPHVCCRVLDVKLHAEEGSDEVYCQVLLVPESEQVEKNLRHGVVDVDGEEDDTEAVVKSTTPHMFCKTLTASDTSTHGGFSVPRRAAEDCFPPLDYSQQRPSQELVAKDLHGLEWRFRHIYRGQPRRHLLTTGWSAFVNKKKLVSGDAVLFLRGDDGELRLGIRRAAQLKNGGIFATPSIQQLNPGSVMNIINALSSRSAFSVCYNPRVSSKEFIIPPHKFLKSLDFCYSVGMRFQMRFETEDAAERRFTGLIAGIGDADPVRWPGSKWRCLLVRWDDVEASRHNRVSPWEIEPSGPAPTSNNLMAA…
>AhARF.17-8
MPRLRRSSPTLSTSPSSPTPIPAKFWRACAGISARAPVMNSKVYYFPQGHIDQAASKPRNLSSLVYARPVIPCRVSAVNFFADRNTDEVFLKILLHPVTDGSAQDFFPPAGAAEGSGGNGNGDDEKVESYAKILTRSDANNGGAFLVPRLCADLILPPLNFEEKRPGQTLSITDLHGNVWEFRHGYRGRPKRHLLTAGWSKFVDSKKLIYGDTLIFMKDSDGKIFVGLRRNMSPDEDGLDWLSAASVGMDELEKEEEEVMTEGFARNGKGRVTSASVAEAMELAAQNKPFEVIYYPSVGWEEFIVKAEDVETKMNDVLYSVGKRVKMARENYDSSQMTWFQGTVSGISVPADDQPWSSSPWRMLQVTWDDHDEILKNANSVSPWQVEILSALPSTPAAF…
>AhARF.17-6
MPRRSAPSSSLPPRPTPIPAKFWRACAGISAQAPVVNSRVYYFPQGHIDQAASQPRNLSPLVYSRPVIPCRVSAVNYFADPNTDEVFLKILLLPVTDGSAQDFLPPAVAAEGNSGNGNGDDEEVASYAKILTRSDANNGGGFSVPRSCADLVFPPLNFEEDPPVQNLRITDLHGAVWEFRHIHRGTPRRHLFTSGWSKFVNSKKIISGDTVVFMKDSDGRMFVGLRRNMSLDDDISDGGLDWCEAIVGMDAGKEEKEEKEEEEVMTEGFARNGKGRVTSTSVAEAMELAAQNKPFEVVYYPSVGWGEFVVKAEDMDAMINGIPWSVGMRVKMGRENYDSSRMDWFQGTVSGVTVPGKDQPWSGSPWRMLQITWDESEILKNVNPVSPWQVELLSETLLL…
>AhARF.3-1
MAGLIDLNTTEDDETPSYGSYAASPSSSSSHSGTSTASVSASAPVVPGSSSNSVCLELWHACAGSMISLPKKGTLVVYFPQGHSEQQLHDFPLSNNNNSIPPHVFCRVLDVKLHAEEGSDEVYCQVLLVPENEQKFQEGDIEADGEEEDTDAVMKATTPHMFCKTLTASDTSTHGGFSVPRRAAEDCFPPLDYSQQRPSQELVAKDLHGREWKFRHIYRGQPRRHLLTTGWSAFVNKKQLVSGDAVLFLRGADGELRLGIRRAGQLKSDGKFSVLPHQQLNHSTPVEVINALSSRCAFSVHYNPRVSSSDFIIPVHKFLKSLDYSYSVGMRFRMRFETEDAADRRITGLIIGINDVDPVRWPGSKWRCLLVRWDDLETTRHNRVSPWEIEPSGSASTAS…
>AhARF.3-3
MAGLIDLNTTEDDETPSYGSYAASPSSSSSHSGTSTASVSASAPVVPGSSSNSVCLELWHACAGSMISLPKKGTLVVYFPQGHSEQQLHDFPLSNNNNSIPPHVFCRVLDVKLHAEEGSDEVYCQVLLVPENEQKFQEGDIEADGEEEDTDAVMKATTPHMFCKTLTASDTSTHGGFSVPRRAAEDCFPPLDYSQQRPSQELVAKDLHGREWKFRHIYRGQPRRHLLTTGWSAFVNKKQLVSGDAVLFLRGADGELRLGIRRAGQLKSDGKFSVLPHQQLNHSTPVEVINALSSRCAFSVHYNPRVSSSDFIIPVHKFLKSLDYSYSVGMRFRMRFETEDAADRRITGLIIGINDVDPVRWPGSKWRCLLVRWDDLETTRHNRVSPWEIEPSGSASTAS…
>AhARF.17-7
MPRRSAPSSSLPPRPTPIPAKFWRACAGISAQAPVVNSRVYYFPQGHIDQAASQPRNLSPRVYSRPVIPCRVAAVNYFADPNTDEVFLKILLLPVTDGSAQDFLPPAVAAEGNSGNGNGDDEEVASYAKILTRSDANNGGGFSVPRSCADLVFPPLNFEEDPPVQNLRITDLHGAVWEFRHIHRGTPRRHLFTSGWSKFVNSKKIISGDTVVFMKDSHGRMFVGLRRNMSLDDDISDGGLDWCEAIVGMDEGKEEKEEKEEEEEVMTEGFARNGKGRVSSTSVAEAMELAAQNKPFEVVYYPSVGWGEFVVKAEDVDAMINGIPWSVGMRVKMGRENYDSSRMDWFQGTVSGVTVPGKDQPWSGSPWRMLQITWDESEILKNVNSVSPWQVELLSETFL…
>AhARF.17-3
MRPSQPRRLPPKAASLDPKIWRACAGASVHIPAVHSRVYYFPQGHLEQAFPPSLHNNHHNHHLNPLIRTLPFVLCRVSSVQFLADPLSDEVFAKLLLSPIAADDRSSSTSEDRPAEEPDSIGGNRVSSFAKILTPSDANNGGGFSVPRFCADSIFPALDFNADPPVQVLSVTDVHGATWDFRHIYRGTPRRHLLTTGWSKFVNHKKLVAGDSVVFLKNSQGSLFVGIRRTLRFSAVLKEDRDPWLEEEEEEDNSSDPPVFTRDGRGKVTLKAVAEAAELAARTMPFEVVYYPRAGWSDFVVKAEAVEAAMKAGWCPGMRVKMAVETEDASRMTWFQGTVSSASVPDNGPWRGSPWRMLQVTWDEPEVLQNAKRISPWQVELISTTPTLHTVFPPTKKFR…
>AhARF.3-4
MISLPKKGSVVVYLPQGHFEQAQDFPVTAYNIPPHVCCRVLDVKLHAEEGSDEVYCQVLLVPESEQVEKNLRHGVVDADGEEDDTEAVVKSTTPHMFCKTLTASDTSTHGGFSVPRRAAEDCFPPLDYSQQRPSQELVAKDLHGLEWRFRHIYRGQPRRHLLTTGWSAFVNKKKLVSGDAVLFLRGDDGELRLGIRRAAQLKNGGIFATPSIQQLNPGSVMNIINALSSRSAFSVCYNPRVSSSEFIIPPHKFLKSLDFCYSVGMRFQMRFETEDAAERRFTGLIAGIGDADPVRWPGSKWRCLLVRWDDVEAGRHNRVSPWEIEPSGPAPTSNNLMAAGLKRSRIGSSGKLEFPLPNGIGTSDFGESLRFRKVLQGQEILGVNTPYDGINSQSPRLSE…
>AhARF.16-1
MDRTRTPIQTCLDSQLWHACAGPMVQMPPLNTKVLYFPQGHAEHQQAHAHGRKPHFAPAMKTPIPPFFPCTLTAIKYMAEPETDEVYVKITLTPLLSDPEEHDHHCSSNHNSFLDNNGEKPASFAKTLTQSDANNGGGFSVPRYCAETIFPRLDYSAEPPVQTIIAKDVHGQCWKFRHIYRGTPRRHLLTTGWSNFVNHKKLVAGDSIVFLRAQNGDLCVGIRRAKKGGIAAGTATNTNITTNNNVGEAVNCAVNGRPFEVVYYPRGSSPEFCVKASSVRASMQIQWCSGMRFKMPFETEDSSRISWFMGTISSVQLSDPLHWPHSPWRLLQVVWDEPDLLQNVKCVNPWLVELVSNVPNFHLSPFSPPRKKQRFLQDQPDFQLINQIPIPSSFSTIQD…
>AhARF.2-1
MASTEELMNRKVETNNNNGGMNAAEAQNASSSSSSSSARDAEAALYKELWHACAGPLVTVPKEGELVFYFPQGHIEQVEASTNQVAEQHMPVYDLPSKILCRVINVMLKAEPDTDEVFAQLTLLPEPNQDENAVEKATPPAPPPRFHVHSFCKTLTASDTSTHGGFSVLRRHADECLPPLDMSKQPPTQELVAKDLHGNEWRFRHIFRGGLKIPGQPRRHLLQSGWSVFVSSKRLVAGDAFIFLRGENGELRVGVRRAMRQQGNVPSSVISSHSMHLGVLATAWHAILTGTMFTVYYKPRTSPAEFIVPYDQYMESLKNNYTIGLRFKMRFEGEEAPEQRFTGTIVGIEDADSKRWPESKWRSLKVRWDETSTIPRPERVSPWK
>AhARF.17-9
MRPSQPRRLPPKAASLDPKIWRACAGASVHIPAVHSRVYYFPQGHLEQAFPPSLHNNHHHHHLNPLIRTLPFVLCRVSSVQFLADPLSDEVFAKLLLSPIPADDRSSSTSEDRPAEEPDSIGGNRVSSFAKILTPSDANNGGGFSVPRFCADSIFPALDFNADPPVQVLSVTDVHGATWDFRHIYRGTPRRHLLTTGWSKFVNHKKLVAGDSVVFMKNSQGSLFVGIRRTLRFSAVLKEDRDPWLEEEEEEDNSSDPPVFTRDGRGKVTLKAVAEAAELAARTMPFEVVYYPRAGWSDFVVKAEAVEAAMKAGWCPGMRVKMAVETEDASRMTWFQGTVSSASVPDNGPWRGSPWRMLQVTWDEPEVLQNAKRISPWQVELISTTPTLHTVFPPTKKFR…
>AhARF.18-2
MFGESSGRWLDSELWHACAGSMVQMPPLNSKVLYFPQGHAEHAHGGKVDFTTRIPSFIPCWLSGLKYMADSDTDEVFVKLSLTPLTQENTNALLMDLEDGGDDCGNNNGGVVEGGNQEKPASFAKTLTQSDANNGGGFSVPRYCAETIFPRLDYSADPPVQNIVAKDVHGNCWKFRHIYRGTPRRHLLTTGWSNFVSQKKLVAGDSIVFLRAKDGDLCVGIRRAKKVAVGGGEVSVSSVVEAVSCGVNGRPFEVVYYPRGSSPEFCVKASVVRDAMKVRWCSGMRFKMPFETEDSSRISWFMGTISSVQLLDPIHWPNSPWRLLQVVWDEPELLQHVKCKT
>AhARF.18-8
MFGESSGKWLDSELWHACAGSMVQMPPLNSKVLYFPQGHAEHAHGGKVDFRTRIPSFIPCWLSGIKYMADSDTDEVFVKLFLTPLTQENTNALLMDLEDGGDDCGNNNGGVVEGGHQEKPASFAKTLTQSDANNGGGFSVPRYCAETIFPRLDYSADPPVQNIVAKDVHGNCWKFRHIYRGTPRRHLLTTGWSNFVSQKKLVAGDSIVFLRAKDGDLCVGIRRAKKVAVGGGEVSVSSVVEAVSFGVNGRPFEVVYYPRGSSPEFCVKASVVRDAMKVRWCSGMRFKMPFETEDSSRISWFMGTISSVQLLDPIHWPNSPWRLLQVVWDEPELLQHVKCVNPWLVELVSDIPTYHLSPFSPTRKKPRFLHNQDFHLINNQLPIMPGFPSNYSYSNDNHL…
>AhARF.16-2
MDRSRTRTTTSAIQTCLDSQLWHACAGPMVQMPPLNTKVLYFPQGHAEHEQAHAHGRKPHFAPTIKTPIPPFFPCTLTAIKYMAEPETDEVYVKITLTPLPQQHHLSDPEEHDHHCSSNHNSFLDNNNNGEKPASFAKTLTQSDANNGGGFSVPRYCAETIFPRLDYSAEPPVQTIIAKDVHGQCWKFRHIYRGTPRRHLLTTGWSNFVNHKKLVAGDSIVFLRAQNGDLCVGIRRAKKGGIGAGTATNTNISTTNNVGYGGGECNCVGEAVNCAVNGRAFEVVYYPRGSSPEFCVKASSVRASMQIQWCSGMRFKMPFETEDSSRISWFMGTISSVQLSDPLHWPHSPWRLLQVVWDEPDLLQNVKCVNPWLVELVSNVPNFHLSPFSPPRKKQRFLQ…
>AhARF.2-2
MASSEAATTIKVNGNSHNNNNNNNNSSELNNNVHSSSSSSTSPKDAEAALYRELWHACAGPLVTVPREGERVFYFPQGHIEQVEASTNQVADQHMPVYDLPSKILCRVINVQLKAEPDTDEVFAQITLLPEQNQDESAVEKEPPLPPPPRFHVHSFCKTLTASDTSTHGGFSVLRRHADECLPPLDMSKQPPTQELVAKDLHANEWRFRHIFRGQPRRHLLQSGWSVFVSSKRLVAGDAFIFLRGENGELRVGVRRAMRQQGNVPSSVISSHSMHLGVLATAWHAILTGTIFTVYYKPRTSPAEFIVPYDQYMESLKNNYTIGMRFKMRFEGEEAPEQRFTGTIVGIEDADSKRWPESKWRCLKVRWDETSNIPHPERVSPWKIEPALAPPALNPLSMP…
>AhARF.18-5
MADGAGDDLFKELWRLCAGPLMDVPCVQDRVFYFPQGHIELLPEPTEQELRQMKNQKSPKYDLPSKILCRVIDVKCLAEMETDEVYARITLQPSSDQNDPLDPNPICSEKPKQKFYSFCKTLSTSDTSTHGGFSVLRKHANECLPQLDMTMENPTQELVAKDIHGVEWKFKHIYRGHPKRHLLTTGWSAFVAAKKLVAGDSFVFLRGENGQLRVGVRRLNPPQSPTPSSVVSTQNMRLGVIVTASHSVMTSTMFVVYYKPRTSQFIVSLNKYIDTMNNDFKIGMRFKMRHEGEDPLDKRFCGTIIGVGDESREWPNSQWRSLKVQWDEPATMQRPDRVSCWEIEPLVTSPLNTIQPMAKGKRSRHAEASSSAASGSKESQVATIWQPPHLNGNGNSSQD…
>AhARF.1-1
MASNQIQSSTTIHAGATNDALYKELWHACAGPLVTLPREGERVYYFPQGHMEQLEASMNQGLEQQMPSFNLPSKILCKVVNVHLRAEPETDEVYAQITLLPEADQSEVVSPDDPLPEPPRCTVHSFCKTLTASDTSTHGGFSVLRRHADDCLPPLDMSQQPPWQELVATDLHGNEWHFRHIFRGQPRRHLLTTGWSVFVSSKKLVAELRVGVRRLMRQQNNMPSSVISSHSMHLGVLATASHAIATGTLFSVFYKPRTSRSEFIVSINKYLEARNHKLSVGMRFKMRFEGDEVPERRFSGTIVGVGDSTSSVWADSEWRSLKVQWDEPSSILRPDRVSPWELEPLVSTTPANSQPAQRTKRSRPPILPSPMPDSSMQGVWKPPVESPSFSYREHGRDLY…
>AhARF.1-2
MASNQIQSSTTIHAGATNDALYKELWHACAGPLVTLPREGERVYYFPQGHMEQLEASMNQGLEQQMPSFNLPSKILCKVVNVHLRAEPETDEVYAQITLLPEADQSEVVSPDDPLPEPPRCTVHSFCKTLTASDTSTHGGFSVLRRHADDCLPPLDMSQQPPWQELVATDLHGNEWHFRHIFRGQPRRHLLTTGWSVFVSSKKLVAELRVGVRRLMRQQNNMPSSVISSHSMHLGVLATASHAIATGTLFSVFYKPRTSRSEFIVSINKYLEARNHKLSVGMRFKMRFEGDEVPERRFSGTIVGVGDSTSSVWADSEWRSLKVQWDEPSSILRPDRVSPWELEPLVSTTPANSQPAQRTKRSRPPILPSPMPDSSMQGVWKPPVESPSFSYREHGRDLY…
>AhARF.18-6
MADGAGDDLFKELWRLCAGPLMDVPCVQDRVFYFPQGHIELLPEPTEQELRQMKNQKSPKYDLPSKILCRVIDVKCLAEMETDEVYARITLQPSSDNDPLDPNPICSEKPKQKFYSFCKTLSTSDTSTHGGFLVLRKHANECLPQLDMTMENPTQELVAKDIHGVEWKFKHIYRGHPKRHLLTTGWSAFVAAKKLVAGDSFVFLRGENGQLRVGVRRLNPPQSPTPSSVVSTQNMRLGVIVTASHSVMTSTMFVVYYKPRTSQFIVSLNKYIDTMNNDFKIGMRFKMRHEGEDPLDKRFCGTIVGVGDESREWPNSQWRSLKVQWDEPATMQRPDRVSCWEIEPLVTSPLNTIQPMAKGKRSRHAEASSSAASGSKESQVATIWQPPHLNGNGNSSQDP…
>AhARF.18-3
MADGAGDDLFKELWRLCAGPLMDVPCVQDIVFYFPQGHIELLPEPTEQELRQMKNQKSPKYDLPSKILCRVIDVKCLAEMETDEVYARITLQPSSDELVAKDIHGVEWKFKHIYRGHPKRHLLTTGWSAFVAAKKLVVGDSFVFLRGENGQLRVGVRRLNPPQSPTPSSVVSTQNMRLGVIVTASHSVMTSTMFVVYYKPRTSQFIVSLNKYIDTMNNDFKIGMRFKMRHEGEDPLDKRFCGTIVGVGDESQEWLNSQWRSLKVRWDEPATMQRPDRVSCWEIEPLVTSPLNMIQPMAKGKRSRHAEASSSGSKESQVATIWQPPHLNGNGNSSQDPENNKAVVLAGPAGEGPACDHNEDGKKGMDCWLFGVNLTSSYSNVVTPLEKELWCEASTILHC…
>AhARF.5-2
MFKNVESGAALMASLEEKVKTCGVGVVGGQTLVAEMKLLKEMQEHSGVRKTLNSELWHACAGPLVSLPQVGSLVYYFPQGHSEQVAASTRRTATSQIPNYPNLPSQLLCQVQNVTLHADKDTDEIYAQMSLQPLNSEKDVFPISDFGLKHSKHPTEFFCKTLTASDTSTHGGFSVPRRAAEKLFPPLDYTIQPPTQELVVRDLHDNTWTFRHIYRGQPKRHLLTTGWSLFVGSKRLRAGDSVLFIRDEKSQLRVGVRRVNRQQTTLPSSVLSADSMHIGVLAAAAHAASNRIPFTIFYNPRACPSEFVIPLAKYRKSVYGTQLSVGMRFGMMFETEESGKRRYMGTIVGISDLDPLRWPGSKWRNIQVEWDEPGCGDKQNRVSVWEIETPESLFIFPSL…
>AhARF.4-4
MEIDLNHAVTEVEKNATCNGGCHKEQATASCVCCVPPSSSSSSSSTAVSSSSYLELWHACAGPLTSLPKKGNVVVYFPQGHLEQAASFSPFTPLEIPTHDLQPQIFCRVVNVQLLANKENDEVYTQVTLLPQAELAGMGKELLEELGADEEGNGRTPTKTTPHMFCKTLTASDTSTHGGFSVPRRAAEDCFPPLDYKQQRPSQELIAKDLHGVEWKFRHIYRGQPRRHLLTTGWSIFVSQKNLVSGDAVLFLRGENGELRLGIRRAVRPRNGLPESIVGNQSCYPNFLSSVANAISAKSMFHVFYSPRASHADFVVSYQKYAKSIKNPVTIGTRFKMKFEMDESPERRCTSGIVTGMSDLDPYRWPKSKWRCLMVRWDEDMETNHQDRVSPWEIDPSAS…
>AhARF.2-4
MASSEAATTIKVNGNSHNNNNNNNIINNNSSELNNNVHSSSSSSTSPKDAEAALYRELWHACAGPLVTVPREGERVFYFPQGHIEQVEASTNQVADQHMPVYDLPSKILCRVINVQLKAEPDTDEVFAQITLLPEQNQDENAVEKEPPLPPPPRFHVHSFCKTLTASDTSTHGGFSVLRRHADECLPPLDMSKQPPTQELVAKDLHANEWRFRHIFRGQPRRHLLQSGWSVFVSSKRLVAGDAFIFLRGENGELRVGVRRAMRQQGNVPSSVISSHSMHLGVLATAWHAILTGTIFTVYYKPRTSPAEFIVPYDQYMESLKNNYTIGMRFKMRFEGEEAPEQRFTGTIVGIEDADSKRWPESKWRCLKVRWDETSNIPRPERVSPWKIEPALAPPALNP…
>AhARF.19-1
MKAPSNGFLPNSGEGEKKTINSELWHACAGPLVSLPPIGSLVVYFPQGHSEQVAASMQKEADFVPSYPNLPSKLICMLHNVVLHADPETDEVYAQMTLQPVNKYDKEAILASDMGLKQNQQPTEFFCKTLTASDTSTHGGFSVPRRAAEKIFPPLDFSMQPPAQEIVAKDLHDSTWTFRHIYRGQPKRHLLTTGWSVFVSTKRLFAGDSVLFIRDEKQQLLLGIKRANRQQPALSSSVISSDSMHIGILAAAAHAASNNSPFTIFYNPRASPSEFVIPLAKYNKAMYTQVSLGMRFRMMFETEESGVRRYMGTITGVSDLDPVRWKNSQWRNLQVGWDESTAGERPSRVSIWDVEPVVTPFYICPPPFFRPKFPKQPGMPEDESDIENAFKRAMPWLGD…
>AhARF.2-3
MASTEELMNRKVETNNNNGGMNAAEAQNASSSSSSSSARDAEAALYKELWHACAGPLVTVPKEGELVFYFPQGHIEQVEASTNQVAEQHMPVYDLPSKILCRVINVMLKAEPDTDEVFAQVTLLPEPNQDENAVEKAPPPAPPPRFHVHSFCKTLTASDTSTHGGFSVLRRHADECLPPLDMSKQPPTQELVAKDLHGNEWRFRHIFRGGLKIPGQPRRHLLQSGWSVFVSSKRLVAGDAFIFLRGENGELRVGVRRAMRQQGNVPSSVISSHSMHLGVLATAWHAILTGTMFTVYYKPRTSPAEFIVPYDQYMESLKNNYTIGLRFKMRFEGEEAPEQRFTGTIVGIEDADSKRWPESKWRSLKVRWDETSTIPRPERVSPWKIEPALAPPALNPLPM…
>AhARF.8-2
MKLSTSGLPQQGQHEGGEKKCLNSELWHACAGPLVSLPTAGTRVVYFPQGHSEQVAATTNREVDGHIPNYPSLPPQLICQLHNVTMHADVETDEVYAQMTLQPLTPQEQKDTFLPMELGVPSKQPSNYFCKTLTASDTSTHGGFSVPRRAAEKVFPPLVDFSLQPPAQELIARDLHDVEWKFRHIFRGSSKYLVFSICWASVVEDSQRGTFLLPAGVYLLVPKDLWQEILCFSYGVYFYLFVNLNFPFDAAESLFTVSICISIIRNEKNQLLLGIRRANRPQTVMPSSVLSSDSMHIGLLAAAAHAAATNSCFTVFYNPRASPSEFVIPLSKYIKAVYHTRVSVGMRFRMLFETEESSVRRYMGTITGISDLDPVRWPNSHWRSVKVGWDESTAGDRQP…
>AhARF.4-7
MEIDLNHAVTEVEKNATCNGGCHKEQATASCVCCVPSSSSSSSSSSAVSSSSYLELWHACAGPLTSLPKKGNVVVYFPQGHLEQAASFSPFTPLEIPTHDLQPQIFCRVVNVQLLANKENDEVYTQVTLLPQAELAGMGKELLEELGADEEGNGRTPTKTTPHMFCKTLTASDTSTHGGFSVPRRAAEDCFPPLDYKQQRPSQELIAKDLHGVEWKFRHIYRGQPRRHLLTTGWSIFVSQKNLVSGDAVLFLRGENGELRLGIRRAVRPRNGLPESIVGNQSCYPNFLSSVANAISAKSMFHVFYSPRASHADFVVSYQKYAKSIKNPVTIGTRFKMKFEMDESPERRCTSGIVTGMSDLDPYRWPKSKWRCLMVRWDEDMETNHQDRVSPWEIDPSAS…
>AhARF.4-2
MDIDLNHAVVVSSEDDDESNVECDKGASSPSPSDSAMSSYLELWHACAGPLTSLPKKGNVVVYFPQGHLEQSSSFSHFTPIDVPNYDLQPQILCRVVNVQLLANKENDEVYTQITLLPQSDELEDKNLEGKEVEEIGGDEEGNGVPPLKPTTHMFCKSLTASDTSTHGGFSVPRRAAEDCFPPLVSNLNSSLLLTTLFVLKLYVTLEIRYINNSDYKQQRPSQELVAKDLHGVEWRFRHIYRGQPRRHLLTTGWSMFVGQKKLVSGDAVLFLRGENGELRLGIRRAIRPRNGLPGTVIGNQNCYPNFLSSVSDAISTKSMFHVFYSPRYADKTDILYTYFVSASHAPFVVPYQKYVKSINNPVTIGTRFKMTFEMDESPERRCGGGTVIGMSEVDPYRW…
>AhARF.4-5
MDIDLNHAVVVSSEDDDESNVECDKAASSPSPSGSAMSSYLELWHACAGPLTSLPKKGNVIVYFPQGHLEQASSFSHFAPIDVPNYDLQPQILCRVVNVQLLANKENDEVYTQITLLPQSDELEDKNLEGKEVEEIGGDEEGNGVPPLKPTTHMFCKSLTASDTSTHGGFSVPRRAAEDCFPPLDYKQQRPSQELVAKDLHGVEWKFRHIYRGQPRRHLLTTGWSMFVGQKKLVSGDAVLFLRGENGELRLGIRRAIRPINGLPGTVIGNQNCYPNFLSSVSDAISTKSMFHVFYSPRASHAPFVVPYQKYVKSINNPVTIGTRFKMTFEMDESPERRCGGGTVIGMSEVDPYRWPKSKWRCLMVRWDEDIDTNHQDRVSPWEIDPFASLPPLSLQSSP…
>AhARF.8-3
MATELPHDGEGASYDDDTAYYGQPKRHLLTTGWSVFVSAKRLVAGDSVLFIWNEKNQLLLGIRRANRPQTVMPSSVLSSDSMHIGLLAAAAHAAATNSCFTVFYNPRASPSEFVIPLSKYIKAVYHTRVSVGMRFRMLFETEESSVRRYMGTITGISDLDPVRWPNSHWRSVKVGWDESTAGDRQPRVSLWEIEPLTTFPMYPSLFPLRLKRPWHPGTSSFLDGRDDPTNGLMWLRGGPGDQGLNSINFQSVGMLPWMQQRLDPALLGNDHNQQYQAMLAAGLQNIGSGELLRQQMLNFQQPFNYLHQSGNVNTSIQLQQQQQTIQQSVPSNILQPQAPVLGENMTQQQLFQKSHNNREDHAEQHTYQDALLVQGDQLHQRQHSSLPSPSYSKSEFVDS…
>AhARF.19-3
MKAPSNGFLPNSGEGEKKTINSELWHACAGPLVSLPPIGSLVVYFPQGHSEQVAASMQKEADFVPSYPNLPSKLICMLHNVVLHADPETDEVYAQMTLQPVNKYDKEAILASDMGLKQNQQPTEFFCKTLTASDTSTHGGFSVPRRAAEKIFPPLDFSMQPPAQEIVAKDLHDSTWTFRHIYRGQPKRHLLTTGWSVFVSTKRLFAGDSVLFIRDEKQQLLLGIKRANRQQPALSSSVISSDSMHIGILAAAAHAASNNSPFTIFYNPRASPSEFVIPLAKYNKAMYTQVSLGMRFRMMFETEESGVRRYMGTITGVSDLDPVRWKNSQWRNLQVGWDESTAGERPSRVSIWDVEPVVTPFYICPPPFFRPKFPKQPGMPEDESDIENAFKRAMPWLGD…
>AhARF.9-3
MMLNRGSNVSAEGGGDELYSQLWKACAGPLVDVPRVGERVFYFPQGHMEQLEASTNQELNQRIPLFKLPSKILCRVVNIHLLAEQETDEVYAQITLVPESNQADEPTSPDPSPAEPTRPTVHSFSKVLTASDTSTHGGFSVLRKHATECLPALDMSQPTPTQELVAKDLHGYEWRFKHIFRGQPRRHLLTTGWSTFVTSKRLVAGDTFVFLRGQNGELRVGVRRLARQQSNMPSSVISSQSMHLGVLATASHAVATQTLFVVYYKPRTSQFIISLNKYLDAVNNKFSVGMRFKMRFEGDDSTDTDKRFSGTIVGLEDISPHWENSKWRSLKVQWDEPAAVPRPDRVSPWEMEPYVAPALTSSVQPAVVKAKRPRPPSEHPDLDTQSAASVFWDSGLTQA…
>AhARF.9-4
MLNRRGGEEDELYEQLWEACAGPHVDVPRSGQRVFYFPQGHMEQLEESTNQELNQRIPVFKLPTKILCRVVNVHLLAEQETDEVYAQITLVPESNQAEPTSPDSCPAELPRPQNHSFCKVLTASDTSTHGGFSVLRKHATECLPALDMSQPTPTQELVAKDLHGYEWRFKHIFRGQPRRHLITTGWSTFVASKRLVAGDTFVFLRGHNGELRVGLRRNTPQPSSMPSSVISSQSMHLGVLATASHAVATQTLFVVYYKPRRSQFIVGLNKYLEAMNHKFAVAMRFKMRFEGEDTPENERRFSGTIVGVEDISPYWVNSNWRSLKVLWDEPASVPRPDRVSPWEIEPLMASVVTSSLQSPVLKNKRPRLPGEVHELDTRSAASTFWDAALAHSDVTQLSV…
>AhARF.9-5
MSRELKLDIKSSQVWIGEGDEDLYTELWKLCAGPLVDVPRTGERVYYFPQGHMEQLQASTNQEVNQELSQQIPHFNLPTKILCRVVHIQLLAEQETDEVYARITLLPEPDQKEPTIPDPSPVESQRETFHSFSKILTPSDTSTHGGCSIRRMHATECLPPLPSPPSDADENSPPPSQELVAKDLHGFEWKFKHVLRGKGDKGGKGGKGGSPKRHLFTTGWSTFVTSKRLVAGDAFVFLRGEDGEMRVGIRRLARQQIPMPSSVISSQSMHLGVLATASHAVMTRTMFVVYYKPRSSQFIIGLNKYLEAVKNKFTAGMRYKMRFEVEESPERRFSGTIVGVGDVSPGWSNSQWRSLKVHWDEPATFPRPERVSAWEIEPFVVSTALAKRPRHADHTSSSE…
>AhARF.9-1
MMLNRGSNVSAEGGGDELYSQLWKACAGPLVDVPRVGERVFYFPQGHMEQLEASTNQELNQRIPLFKLPSKILCRVVNIHLLAEQETDEVYAQITLVPESNQADEPTSPDPSPAEPTRPTVHSFSKVLTASDTSTHGGFSVLRKHATECLPALDMSQPTPTQELVAKDLHGYEWRFKHIFRGQPRRHLLTTGWSTFVTSKRLVAGDTFVFLRGQNGELRVGVRRLARQQSNMPSSVISSQSMHLGVLATASHAVATQTLFVVYYKPRTSQFIISLNKYLDAVNNKFSVGMRFKMRFEGDDSTDTDKRFSGTIVGLEDISPHWENSKWRSLKVQWDEPAAVPRPDRVSPWEMEPYVAPALTSSVQPAVVKAKRPRPPSEHPDLDTQSATSVFWDSGLTQA…
>AhARF.9-2
MANLECNLRGPPTPTAQTGEGDEDLYTELWKLCAGPLVDVPRTGERVYYFPQGHMEQLQASTNQEVNQELSQQIPHFNLPTKILCRVVHIQLLAEQETDEVYARITLLPEPDQKEPTIPDPSPVESQRETFHSFSKILTPSDTSTHGGCSIRRMHATECLPPLPSPPSDADENSPPPSQELVAKDLHGFEWKFKHVLRGKGDKGGSPKRHLFTTGWSTFVTSKRLVAGDAFVFLRGEDGEMRVGIRRLARQQIPMPSSVISSQSMHLGVLATASHAVMTRTMFVVYYKPRSSQFIIGLNKYLEAVKNKFTAGMRYKMRFEVEESPERRFSGTIVGVGDVSPGWSNSQWRSLKVHWDEPATFPRPERVSAWEIEPFVVSTALAKRPRHADHTSSSEIASN…
>AhARF.4-6
MDADGVTASSSPNAADEGVNNYKKDGDELYERVWRACAGECVYIPRAGDKVLYFPQGYLEQVASFTQHQQDGHVDIPVHNQPSKILCRVVSVQLKTEASTDEVFAQVTLLPESKQDELSSKDTDTAQIPSRSSVYSFSKILTSSDSGAHGGFSIPKKHAYECFPPLDMTLKPPAQELVARDLHGYDWRFRHIFRGQPRRNLLTSGWSTFLNSKKLAAGDTCIFFRGENGELRIGVRRAMKRQNIASPSASLISAQSMQLGILTSASHAVATGSMFTVYHYPRTNPFEFIVPLQRYMKSTQMSYATGMRVQLLLDVEEPRKRYAGTVISIEDFDGIRWPGSEWRSLKVQWDATPHADMHPERVCPWWIEALDCAKQKHIPILPAPKKARPNNLPLPESSG…
>AhARF.17-4
MTRCSAPPSSSPPRPTPIPAKFWRACAGISAQAPVVNSRVYYFPQGHIDQAASQPRNLSPLVYSRPVIPCRVAAVNFFADPKTDEVFLKILLLPVTDGSAQDFLPPAVAAEGSGNGNGDDEKVESYAKILTRSDANNGGGFSVPRFCADLIFPPLNFEEDPPVQTLRITDLHGAVWEFRHIYRGTPRRHLFTSGWSKFVNSKKIISGDTVVFMKDSDGRMFVGIRRNMSSDDGISDGGLDWLATIVGMDEGEKEKEEKNEEVIMEGFARNGKGRVSSASVAEAMELAAQNKPFEVVYYPSVGWGEFVVKAEDVDVKMNGIFCSVGMRVKMARENYDSSRMTWFQGTVSGVTVPGEAQPWSGSPWRMLQITWDESEILKNVSPVSPWQVEFLSDTPSLPQ…
>AtARF1
MAASNHSSGKPGGVLSDALCRELWHACAGPLVTLPREGERVYYFPEGHMEQLEASMHQGLEQQMPSFNLPSKILCKVINIQRRAEPETDEVYAQITLLPELDQSEPTSPDAPVQEPEKCTVHSFCKTLTASDTSTHGGFSVLRRHADDCLPPLDMSQQPPWQELVATDLHNSEWHFRHIFRGQPRRHLLTTGWSVFVSSKKLVAGDAFIFLRGENEELRVGVRRHMRQQTNIPSSVISSHSMHIGVLATAAHAITTGTIFSVFYKPRTSRSEFIVSVNRYLEAKTQKLSVGMRFKMRFEGEEAPEKRFSGTIVGVQENKSSVWHDSEWRSLKVQWDEPSSVFRPERVSPWELEPLVANSTPSSQPQPPQRNKRPRPPGLPSPATGPSGPVTPDGVWKSP…
>AtARF3
MGGLIDLNVMETEEDETQTQTPSSASGSVSPTSSSSASVSVVSSNSAGGGVCLELWHACAGPLISLPKRGSLVLYFPQGHLEQAPDFSAAIYGLPPHVFCRILDVKLHAETTTDEVYAQVSLLPESEDIERKVREGIIDVDGGEEDYEVLKRSNTPHMFCKTLTASDTSTHGGFSVPRRAAEDCFPPLDYSQPRPSQELLARDLHGLEWRFRHIYRGQPRRHLLTTGWSAFVNKKKLVSGDAVLFLRGDDGKLRLGVRRASQIEGTAALSAQYNQNMNHNNFSEVAHAISTHSVFSISYNPKASWSNFIIPAPKFLKVVDYPFCIGMRFKARVESEDASERRSPGIISGISDLDPIRWPGSKWRCLLVRWDDIVANGHQQRVSPWEIEPSGSISNSGSF…
>AtARF11
MANVEADFRTSGSNDDELYTELWKACAGPLVEVPRYGERVFYFPQGHMEQLVASTNQGVVDQEIPVFNLPPKILCRVLSVTLKAEHETDEVYAQITLQPEEDQSEPTSLDPPLVEPAKPTVDSFVKILTASDTSTHGGFSVLRKHATECLPSLDMTQPTPTQELVARDLHGYEWRFKHIFRGQPRRHLLTTGWSTFVTSKRLVAGDAFVFLRGETGDLRVGVRRLAKQQSTMPASVISSQSMRLGVLATASHAVTTTTIFVVFYKPRISQFIISVNKYMMAMKNGFSLGMRYRMRFEGEESPERIFTGTIIGSGDLSSQWPASKWRSLQIQWDEPSSIQRPNKVSPWEIEPFSPSALTPTPTQQQSKSKRSRPISEITGSPVASSFLSSFSQSHESNPS…
>AtARF17
MSPPSATAGDINHREVDPTIWRACAGASVQIPVLHSRVYYFPQGHVEHCCPLLSTLPSSTSPVPCIITSIQLLADPVTDEVFAHLILQPMTQQQFTPTNYSRFGRFDGDVDDNNKVTTFAKILTPSDANNGGGFSVPRFCADSVFPLLNFQIDPPVQKLYVTDIHGAVWDFRHIYRGTPRRHLLTTGWSKFVNSKKLIAGDSVVFMRKSADEMFIGVRRTPISSSDGGSSYYGGDEYNGYYSQSSVAKEDDGSPKKTFRRSGNGKLTAEAVTDAINRASQGLPFEVVFYPAAGWSEFVVRAEDVESSMSMYWTPGTRVKMAMETEDSSRITWFQGIVSSTYQETGPWRGSPWKQLQITWDEPEILQNVKRVNPWQVEIAAHATQLHTPFPPAKRLKYPQ…
>AtARF2
MASSEVSMKGNRGGDNFSSSGFSDPKETRNVSVAGEGQKSNSTRSAAAERALDPEAALYRELWHACAGPLVTVPRQDDRVFYFPQGHIEQVEASTNQAAEQQMPLYDLPSKLLCRVINVDLKAEADTDEVYAQITLLPEANQDENAIEKEAPLPPPPRFQVHSFCKTLTASDTSTHGGFSVLRRHADECLPPLDMSRQPPTQELVAKDLHANEWRFRHIFRGQPRRHLLQSGWSVFVSSKRLVAGDAFIFLRGENGELRVGVRRAMRQQGNVPSSVISSHSMHLGVLATAWHAISTGTMFTVYYKPRTSPSEFIVPFDQYMESVKNNYSIGMRFKMRFEGEEAPEQRFTGTIVGIEESDPTRWPKSKWRSLKVRWDETSSIPRPDRVSPWKVEPALAPP…
>AtARF14
MESGNVVNTQPELSGIIDGSKSYMYEQLWKLCAGPLCDIPKLGEKVYYFPQGHIELVEASTREELNELQPICDFPSKLQCRVIAIQLKVENNSDETYAEITLMPDTTQVVIPTQNQNQFRPLVNSFTKVLTASDTSVHGGFSVPKKHAIECLPPLDMSQPLPTQEILAIDLHGNQWRFRHIYRGTAQRHLLTIGWNAFTTSKKLVEGDVIVFVRGETGELRVGIRRAGHQQGNIPSSIVSIESMRHGIIASAKHAFDNQCMFIVVYKPRSSQFIVSYDKFLDVVNNKFNVGSRFTMRFEGDDFSERRSFGTIIGVSDFSPHWKCSEWRSLEVQWDEFASFPRPNQVSPWDIEHLTPWSNVSRSSFLKNKRSREVNEIGSSSSHLLPPTLTQGQEIGQQS…
>AtARF16
MINVMNPMKGGTEKGLDPQLWHACAGGMVRMPPMNSKVFYFPQGHAENAYDCVDFGNLPIPPMVLCRVLAIKYMADAESDEVFAKLRLIPLKDDEYVDHEYGDGEDSNGFESNSEKTPSFAKTLTQSDANNGGGFSVPRYCAETIFPRLDYNAEPPVQTILAKDVHGDVWKFRHIYRGTPRRHLLTTGWSNFVNQKKLVAGDSIVFMRAENGDLCVGIRRAKRGGIGNGPEYSAGWNPIGGSCGYSSLLREDESNSLRRSNCSLADRKGKVTAESVIEAATLAISGRPFEVVYYPRASTSEFCVKALDARAAMRIPWCSGMRFKMAFETEDSSRISWFMGTVSAVNVSDPIRWPNSPWRLLQVAWDEPDLLQNVKRVNPWLVELVSNVHPIPLTSFSPP…
>AtARF15
METGNVVNAQPELSGIIDRSKSYMYEQLWKLCAGPLCDIPKLGEKVYYFPQGNIELVEASTREELNELQPICDLPSKLQCRVIAIHLKVENNSDETYAKITLMPDTTQVVIPTQNENQFRPLVNSFTKVLTASDISANGVFSVPKKHAIECLPPLDMSQPLPAQELLAIDLHGNQWSFRHSYRGTPQRHLLTTGWNEFTTSKKLVKGDVIVFVRGETGELRVGIRRARHQQGNIPSSIVSIDCMRHGVIASAKHAFDNQCMFIVVYKPRSSQFIVSYDKFLDAVNNKFNVGSRFTMRFEGDDLSERRYFGTIIGVSNFSPHWKCSDWRSLEVQWDEFASFLRPNKVSPWEIEHLMPALNVPRSSFLKNKRLREVNEFGSSSSHLLPPILTQGQEIGQLS…
>AtARF9
MANRGGEYLYDELWKLCAGPLVDVPQAQERVYYFPQGHMEQLEASTQQVDLNTMKPLFVLPPKILCNVMNVSLQAEKDTDEVYAQITLIPVGTEVDEPMSPDPSPPELQRPKVHSFSKVLTASDTSTHGGFSVLRKHATECLPPLDMTQQTPTQELVAEDVHGYQWKFKHIFRGQPRRHLLTTGWSTFVTSKRLVAGDTFVFLRGENGELRVGVRRANLQQSSMPSSVISSHSMHLGVLATARHATQTKTMFIVYYKPRTSQFIISLNKYLEAMSNKFSVGMRFKMRFEGEDSPERRYSGTVIGVKDCSPHWKDSKWRCLEVHWDEPASISRPNKVSPWEIEPFVNSENVPKSVMLKNKRPRQVSEVSALDVGITASNLWSSVLTQPHEFAQSCITSQW…
>AtARF22
MESGNIVNAQPELSGIIDGSKSYMYEQLWKLCAGPLCDIPKLGEKIYYFPQGNIELVEASTREELNELKPICDLPSKLQCRVIAIQLKVENNSDETYAEITLMPDTTQVVIPTQNENQFRPLVNSFTKVLTASDTSGGFFVPKKHAIECLPPLDMSQPLPTQELLATDLHGNQWRFNHNYRGTPQRHLLTTGWNAFTTSKKLVAGDVIVFVRGETGELRVGIRRAGHQQGNIPSSIISIESMRHGVIASAKHAFDNQCMFIVVYKPRSSQFIVSYDKFLDAVNNKFNVGSRFTMRFEGDDFSERRYFGTIIGVSDFSPHWKCSEWRNLEVQWDEFASFSRPNKVSPWEIEHLMPALNVPRPSLLKNKRLREVNEIGSSSSHLLPPILTQGQEIGQLSVA…
>AtARF19
MKAPSNGFLPSSNEGEKKPINSQLWHACAGPLVSLPPVGSLVVYFPQGHSEQVAASMQKQTDFIPNYPNLPSKLICLLHSVTLHADTETDEVYAQMTLQPVNKYDREALLASDMGLKLNRQPTEFFCKTLTASDTSTHGGFSVPRRAAEKIFPPLDFSMQPPAQEIVAKDLHDTTWTFRHIYRGQPKRHLLTTGWSVFVSTKRLFAGDSVLFVRDEKSQLMLGIRRANRQTPTLSSSVISSDSMHIGILAAAAHANANSSPFTIFFNPRASPSEFVVPLAKYNKALYAQVSLGMRFRMMFETEDCGVRRYMGTVTGISDLDPVRWKGSQWRNLQVGWDESTAGDRPSRVSIWEIEPVITPFYICPPPFFRPKYPRQPGMPDDELDMENAFKRAMPWMGE…
>AtARF4
MEFDLNTEIAEVEEEENDDVGVGVGGGTRIDKGRLGISPSSSSSCSSGSSSSSSSTGSASSIYSELWHACAGPLTCLPKKGNVVVYFPQGHLEQDAMVSYSSPLEIPKFDLNPQIVCRVVNVQLLANKDTDEVYTQVTLLPLQEFSMLNGEGKEVKELGGEEERNGSSSVKRTPHMFCKTLTASDTSTHGGFSVPRRAAEDCFAPLDYKQQRPSQELIAKDLHGVEWKFRHIYRGQPRRHLLTTGWSIFVSQKNLVSGDAVLFLRDEGGELRLGIRRAARPRNGLPDSIIEKNSCSNILSLVANAVSTKSMFHVFYSPRATHAEFVIPYEKYITSIRSPVCIGTRFRMRFEMDDSPERRCAGVVTGVCDLDPYRWPNSKWRCLLVRWDESFVSDHQERV…
>AtARF20
METGNVVNAQPELSGIIDGSKSYMYEQLWKLCAGPLCDIPKLGENVYYFPQGNIELVDASTREELNELQPICDLPSKLQCRVIAIHLKVENNSDETYAEITLMPDTTQVVIPTQSENQFRPLVNSFTKVLTASDTSAYGGFFVPKKHAIECLPPLDMSQPLPAQELLAKDLHGNQWRFRHSYRGTPQRHSLTTGWNEFTTSKKLVKGDVIVFVRGETGELRVGIRRARHQQGNIPSSIVSIDCMRHGVIASAKHALDNQCIFIVVYKPRSSQFIVSYDKFLDAMNNKFIVGSRFTMRFEGDDFSERRYFGTIIGVNDFSPHWKCSEWRSLEVQWDEFASFSRPNKVSPWEIEHLMSALNVPRSSLLKNKRLREVNEFGQEIGQLSVASPMNTSLRYRDT…
>AtARF23
MESGNVVNVQSELSGIIDGSKSYMYEQLWKLCAGPLCDIPKLGEKVYYFPQGHIELVEASTREELNELQPNCDLPSKLQCRVIAIHLKVENNSDETYVEITLMPDTTQVVIPTENENQFRPIVNSFTKVLTASDTSAQGEFSVPCKHAIECLPPLDMSQPIPAQELIAIDLHGNQWRFKHSYRVPRGDTTGWNAFTTSKKLVVGDVIVFARGETGELRVGIR
>AtARF5
MMASLSCVEDKMKTSCLVNGGGTITTTTSQSTLLEEMKLLKDQSGTRKPVINSELWHACAGPLVCLPQVGSLVYYFSQGHSEQVAVSTRRSATTQVPNYPNLPSQLMCQVHNVTLHADKDSDEIYAQMSLQPVHSERDVFPVPDFGMLRGSKHPTEFFCKTLTASDTSTHGGFSVPRRAAEKLFPPLDYSAQPPTQELVVRDLHENTWTFRHIYRGQPKRHLLTTGWSLFVGSKRLRAGDSVLFIRDEKSQLMVGVRRANRQQTALPSSVLSADSMHIGVLAAAAHATANRTPFLIFYNPRACPAEFVIPLAKYRKAICGSQLSVGMRFGMMFETEDSGKRRYMGTIVGISDLDPLRWPGSKWRNLQVEWDEPGCNDKPTRVSPWDIETPESLFIFPSL…
>AtARF18
MASVEGDDDFGSSSSRSYQDQLYTELWKVCAGPLVEVPRAQERVFYFPQGHMEQLVASTNQGINSEEIPVFDLPPKILCRVLDVTLKAEHETDEVYAQITLQPEEDQSEPTSLDPPIVGPTKQEFHSFVKILTASDTSTHGGFSVLRKHATECLPSLDMTQATPTQELVTRDLHGFEWRFKHIFRGQPRRHLLTTGWSTFVSSKRLVAGDAFVFLRGENGDLRVGVRRLARHQSTMPTSVISSQSMHLGVLATASHAVRTTTIFVVFYKPRISQFIVGVNKYMEAIKHGFSLGTRFRMRFEGEESPERIFTGTIVGSGDLSSQWPASKWRSLQVQWDEPTTVQRPDKVSPWEIEPFLATSPISTPAQQPQSKCKRSRPIEPSVKTPAPPSFLYSLPQSQ…
>AtARF8
MKLSTSGLGQQGHEGEKCLNSELWHACAGPLVSLPSSGSRVVYFPQGHSEQVAATTNKEVDGHIPNYPSLPPQLICQLHNVTMHADVETDEVYAQMTLQPLTPEEQKETFVPIELGIPSKQPSNYFCKTLTASDTSTHGGFSVPRRAAEKVFPPLDYTLQPPAQELIARDLHDVEWKFRHIFRGQPKRHLLTTGWSVFVSAKRLVAGDSVIFIRNEKNQLFLGIRHATRPQTIVPSSVLSSDSMHIGLLAAAAHASATNSCFTVFFHPRASQSEFVIQLSKYIKAVFHTRISVGMRFRMLFETEESSVRRYMGTITGISDLDSVRWPNSHWRSVKVGWDESTAGERQPRVSLWEIEPLTTFPMYPSLFPLRLKRPWHAGTSSLPDGRGDLGSGLTWLRG…
>AtARF12
MESGNVVNAQPELSGIIDGSKSYVYEQLWKLCAGPLCDIPKLGEKVYYFPQGHIELVETSTREELNELQPICDLPSKLQCRVIAIHLKVENNSDETYAEITLMPDTTQVVIPTQNENQFRPLVNSFTKVLTASDTSAHGGFFVPKKHAIECLPSLDMSQPLPAQELLAIDLHGNQWRFNHNYRGTPQRHLLTTGWNAFTTSKKLVAGDVIVFVRGETGELRVGIRRARHQQGNIPSSIVSIDCMRHGVVASAKHAFDNQCMFTVVYKPRSSKFIVSYDKFLDAVNNKFNVGSRFTMRLEGDDFSERRCFGTIIGVSDFSPHWKCSEWRSLEVQWDEFTSFPGPKKVSPWDIEHLMPAINVPRSFLLKNKRLREVNEIGSSSSHLLPPILTQGQENEQLS…
>AtARF21
MESGNIVNAQPKLSGIIDGSKSYMYEQLWKLCAGPLCDIPKLGENVYYFPQGNIELVQASTREELNELQPICDLPSKLQCRVIAIHLKVENNSDEIYAEITLMPDTTQVVIPTQSENRFRPLVNSFTKVLTASDTSAYGGFSVPKKHAIECLPPLDMSQPLPAQEILAIDLHDNQWRFRHNYRGTPQRHSLTTGWNEFITSKKLVKGDVIVFVRGETGELRVGIRRARHQQGNIPSSIVSIDCMRHGVIASAKHAFDNQCIFIVVYKPRSSQFIVSYDKFLDAVNNKFNVGSRFTMRFEGDDFSERRYFGTIIGVSDFSPHWKCSEWRSLEVQWDEFASFSRPNKVSPWEIEHLVPALNVPRSSLLKNKRLREVNEFGSSSSHLLPPILTQGQEIGQLS…
>AtARF6
MRLSSAGFNPQPHEGEKRVLNSELWHACAGPLVSLPPVGSRVVYFPQGHSEQVAASTNKEVDAHIPNYPSLHPQLICQLHNVTMHADVETDEVYAQMTLQPLNAQEQKDPYLPAELGVPSRQPTNYFCKTLTASDTSTHGGFSVPRRAAEKVFPPLDYSQQPPAQELMARDLHDNEWKFRHIFRGQPKRHLLTTGWSVFVSAKRLVAGDSVLFIWNDKNQLLLGIRRANRPQTVMPSSVLSSDSMHLGLLAAAAHAAATNSRFTIFYNPRASPSEFVIPLAKYVKAVYHTRVSVGMRFRMLFETEESSVRRYMGTITGICDLDPTRWANSHWRSVKVGWDESTAGERQPRVSLWEIEPLTTFPMYPSPFPLRLKRPWPPGLPSFHGLKEDDMGMSMSSP…
>AtARF7
MKAPSSNGVSPNPVEGERRNINSELWHACAGPLISLPPAGSLVVYFPQGHSEQVAASMQKQTDFIPSYPNLPSKLICMLHNVTLNADPETDEVYAQMTLQPVNKYDRDALLASDMGLKLNRQPNEFFCKTLTASDTSTHGGFSVPRRAAEKIFPALDFSMQPPCQELVAKDIHDNTWTFRHIYRGQPKRHLLTTGWSVFVSTKRLFAGDSVLFIRDGKAQLLLGIRRANRQQPALSSSVISSDSMHIGVLAAAAHANANNSPFTIFYNPRWAAPAEFVVPLAKYTKAMYAQVSLGMRFRMIFETEECGVRRYMGTVTGISDLDPVRWKNSQWRNLQIGWDESAAGDRPSRVSVWDIEPVLTPFYICPPPFFRPRFSGQPGMPDDETDMESALKRAMPWL…
>AtARF10
MEQEKSLDPQLWHACAGSMVQIPSLNSTVFYFAQGHTEHAHAPPDFHAPRVPPLILCRVVSVKFLADAETDEVFAKITLLPLPGNDLDLENDAVLGLTPPSSDGNGNGKEKPASFAKTLTQSDANNGGGFSVPRYCAETIFPRLDYSAEPPVQTVIAKDIHGETWKFRHIYRGTPRRHLLTTGWSTFVNQKKLIAGDSIVFLRSESGDLCVGIRRAKRGGLGSNAGSDNPYPGFSGFLRDDESTTTTSKLMMMKRNGNNDGNAAATGRVRVEAVAEAVARAACGQAFEVVYYPRASTPEFCVKAADVRSAMRIRWCSGMRFKMAFETEDSSRISWFMGTVSAVQVADPIRWPNSPWRLLQVAWDEPDLLQNVKRVSPWLVELVSNMPTIHLSPFSPRKK…
>AtARF13
MENNGEMNAQPELSVDITKTYMYEKLWNICAGPLCVLPKPGEKVYYFPQGHIELIENSTRDELDHIRPIFDLPSKLRCRVVAIDRKVDKNTDEVYAQISLMPDTTEVMTHNTTMDTRRPIVYFFSKILTASDVSLSGGLIIPKQYAIECFPPLDMSQPISTQNLVAKDLYGQEWSFKHVFRGTPQRHMFTSGGGWSVFATTKRLIVGDIFVLLRGENGELRFGIRRAKHQQGHIPSSVISANCMQHGVIASVVNAFKTKCMFNVVYKPSSSQFVISYDKFVDAMNNNYIVGSRFRMQFEGKDFSEKRYDGTIIGVNDMSPHWKDSEWRSLKVQWDELSPFLRPNQVSPWDIEHLIPSSDISQSSLKKKKHWLQLNEIGATLSNLWTCQEIGQRSMNSPI…

## Sheet: S6
Table S6 Expression patterns of AhARF genes in different tissues (Clevenger et al., 2016)
Gene	leaf 1	leaf 2	leaf 3	veg shoot	repr shoot	root	nodule	perianth	stamen	pistil	peg tip 1	peg tip 2	peg tip Pat. 1	fruit Pat. 1	fruit Pat. 3	pericarp Pat. 5	pericarp Pat. 6	seed Pat. 5	seed Pat. 6	seed Pat. 7	seed Pat. 8	seed Pat. 10
AhARF1-1	5.68275	7.13102	6.44236	16.4192	15.646	7.24603	5.49991	3.13223	5.95972	4.39969	6.01153	4.65622	4.32614	6.90081	8.40177	6.48821	4.82418	9.53299	9.17166	8.48455	5.63011	7.01025
AhARF1-2	6.24845	6.92042	6.18491	14.9365	15.0263	7.77261	5.38526	3.58021	7.83254	10.3359	6.91323	5.82337	5.93198	7.8766	7.79376	7.16364	5.32885	10.776	10.0606	8.88325	6.00634	8.08065
AhARF2-1	12.5934	13.2371	10.4726	26.1842	24.9018	15.2809	16.4814	8.84214	19.882	14.2682	28.8829	19.4258	48.7691	39.627	46.2348	29.6679	35.6237	15.1323	17.3276	13.8683	7.97843	9.25111
AhARF2-2	16.3394	18.688	13.1515	50.602	50.2544	20.3492	35.4566	14.4086	45.1972	15.4854	31.3619	19.2429	22.3766	34.9359	36.1359	28.163	22.8982	28.2751	29.5228	18.8309	10.7657	6.9748
AhARF2-3	20.9098	21.8005	17.6878	37.4627	40.5039	25.9967	25.6433	13.8076	23.8	12.2581	34.3779	21.7765	52.2739	41.9537	53.8612	37.1408	41.4031	19.8316	22.5394	17.5541	8.99474	12.054
AhARF2-4	8.2538	9.0491	6.56979	18.1892	21.9837	9.82676	22.4092	4.29988	12.7355	3.45034	7.82545	4.92587	8.48122	15.5119	23.2861	14.6625	11.8688	11.5427	12.8085	9.02927	4.42648	3.88541
AhARF3-1	2.15244	2.09769	2.45845	7.74862	5.57774	1.3641	0.745816	1.23897	15.3275	1.00634	4.4205	3.58057	5.71372	3.5719	0.971653	0.935055	0.662587	6.89869	5.71436	3.40083	2.29331	1.10417
AhARF3-2	1.90775	2.0252	1.84975	9.27919	8.51061	1.23965	1.18887	1.65149	6.88849	1.00037	11.5849	13.4232	5.52277	4.58326	0.933397	0.892338	0.667576	4.77416	4.76914	5.29253	3.72039	3.36644
AhARF3-3	2.06342	2.30607	2.90407	8.24558	7.15265	1.63997	0.750664	0.993411	14.5024	0.897559	4.05069	3.3126	2.36082	1.79363	1.63188	0.819229	0.524409	8.69976	6.25706	3.74154	1.51308	1.19134
AhARF3-4	1.86018	1.94542	1.33388	3.75762	4.66891	0.316864	0.407995	0.24704	0.578149	0.687075	1.22163	1.02167	0.351947	1.13565	0.710647	0.455063	0.141556	1.69607	1.24351	0.709945	0.329656	0.26715
AhARF4-1	0.0851451	0.141728	0.0233425	0.240649	0.51564	0.102299	0.692473	2.75904	1.27415	0.519334	0.281135	0.931868	0.175602	0.394633	0.322951	0.545491	0.238314	0.159176	0.125076	0.0613451	0.0484444	0.0501617
AhARF4-2	0.0995277	0.278285	0.0233313	0.416715	0.980677	0.118961	0.722712	2.88836	0.327059	0.224921	0.345358	1.04697	0.266107	0.571174	0.635505	0.729006	0.250651	0.260767	0.207185	0.116513	0.0760904	0.0501376
AhARF4-3	0.00233849	0.015777	0.0201758	0.722433	0.617068	0.00941903	0.0102713	0.0273158	0.192197	0.537835	0.0490417	0.0882647	0.0113647	0.0308084	0.0202477	0.00777017	0.00960657	0.0657613	0.13288	0.0397243	0.041654	0.0032672
AhARF4-4	2.01338	2.35497	1.6707	9.74657	8.24041	3.92175	2.71966	2.61185	7.62184	1.23659	3.5508	5.21198	6.2302	5.4516	2.9675	2.71064	2.31198	7.07536	6.06358	3.33584	3.09103	3.33823
AhARF4-5	0.495557	0.57586	0.410569	2.05881	2.80717	0.460422	1.86952	5.48714	3.46197	0.716657	3.51583	6.07242	4.84546	5.33339	3.91096	5.25943	2.13493	1.16658	1.24665	0.786039	0.211173	0.494991
AhARF4-6	0.0751162	0.0420607	0.0163585	2.41932	1.78138	0.0564452	0.350839	0.0114581	0.141125	0.500315	0.176428	0.179403	0	0.0324394	0.0174275	0.0138371	0.0111257	0.381749	0.44363	0.112833	0.0836548	0.0168726
AhARF4-7	1.5971	1.89745	1.52559	9.38298	7.82805	3.42096	1.84705	0.975174	3.78594	0.552208	3.54527	4.21979	3.65509	3.72518	2.89842	2.27614	1.8367	4.6372	4.19998	2.82836	2.56834	2.79793
AhARF5-1	0.153165	0.134963	0.162146	3.64351	3.86106	1.71045	0.732157	0.189234	7.12615	0.137331	0.455067	1.0898	0.303025	2.43892	1.36512	0.875694	0.698284	3.07713	2.52819	1.54981	1.47029	2.05314
AhARF5-2	0.236842	0.329266	0.335672	5.68817	6.40124	2.85727	1.14754	0.241712	11.4781	2.19799	0.714509	1.33408	0.46962	2.75634	1.14405	0.692858	0.456257	4.71312	4.21025	1.93446	1.90861	2.28768
AhARF6-1	2.17319	2.38594	1.74452	18.3282	15.4773	7.28129	2.32799	12.6081	21.8258	3.1985	9.88341	8.93011	17.338	15.9765	15.5104	15.3606	14.5612	3.18885	4.31162	3.46414	2.59822	5.48909
AhARF6-2	4.13246	5.02036	3.7727	14.0139	15.042	4.78497	1.96656	1.93186	9.77949	5.25951	7.26586	7.53947	4.94638	7.34368	7.1171	6.56241	4.46373	4.48752	5.29882	5.11266	4.32065	5.03871
AhARF6-3	2.89053	4.12961	2.83277	40.7519	40.5275	6.85911	0.760468	17.5429	75.871	6.38968	22.934	17.7402	23.1717	28.737	21.8819	16.7298	11.0094	6.64879	7.32885	5.52827	3.53872	8.59893
AhARF6-4	2.44451	2.74725	2.02062	18.3054	16.2563	6.81959	2.67122	11.7491	26.1105	2.9426	9.84943	9.52603	15.6498	16.6791	12.5028	11.441	10.685	3.0825	4.50222	3.44914	2.75905	3.63116
AhARF6-5	2.61969	2.98941	2.08228	7.87012	7.67342	2.82647	1.35876	1.53264	5.4783	3.16813	4.73321	4.36874	4.00668	5.26181	4.63181	5.14515	3.46923	2.18763	2.3445	2.13083	2.07388	2.89316
AhARF6-6	2.91971	3.76294	2.7431	40.0515	42.0872	3.94285	0.325805	11.1117	67.6419	3.56902	18.9931	15.7664	15.8284	18.5488	18.0474	14.8629	10.0692	5.89278	5.78751	4.14055	2.47516	6.56463
AhARF8-1	5.59425	5.33396	5.5032	13.5331	13.8684	2.85196	0.89404	0.545219	11.8736	1.4697	6.90023	8.63602	4.81519	6.70764	4.56155	3.84494	2.75938	3.76353	3.43894	3.46495	2.00853	2.54623
AhARF8-2	0.597653	0.81866	0.394597	3.99694	4.0096	0.50883	0.17023	0.515352	2.79974	0.600115	1.48308	1.9557	0.550042	1.39913	1.63055	0.698718	0.539341	0.457446	0.44636	0.699349	0.700242	0.642676
AhARF8-3	0.410639	0.541005	0.107266	1.89071	2.17221	0.307046	0.120496	0.31876	0.742181	1.71049	0.710465	1.09393	0.291389	0.803069	0.603908	0.382347	0.311565	0.232081	0.161153	0.322246	0.319674	0.387786
AhARF8-4	6.31435	6.01547	5.09862	14.8264	16.4936	3.18934	1.30356	1.2191	11.4054	3.42743	7.76385	9.72106	5.81935	7.06635	5.75023	4.96452	3.5927	3.78432	4.15158	4.19703	2.14385	3.18255
AhARF9-1	4.86776	5.12101	5.50335	14.1662	15.117	33.5116	30.132	1.7981	10.496	3.34739	4.7851	4.73789	18.4245	16.2463	16.5865	20.3405	20.6534	7.37826	9.47893	10.2598	8.48849	2.88896
AhARF9-2	2.11672	3.58614	3.34521	6.75143	6.23325	18.2453	2.2156	0.231676	1.9625	4.14369	1.75164	1.65464	3.09035	4.15698	3.10506	1.07425	1.1916	5.1788	4.25444	0.901554	0.285364	0.0309919
AhARF9-3	6.49856	7.68959	5.92562	15.8845	14.275	33.6685	24.9388	2.5248	7.57097	3.25471	6.0169	4.47208	20.7673	17.1447	14.1559	20.5312	21.5882	8.71462	10.5757	9.76898	7.08186	2.61842
AhARF9-4	1.37292	1.62925	0.792071	16.6818	6.86695	6.21265	6.34472	0.558393	3.89224	1.46501	1.6836	1.58488	3.82568	5.49733	2.22976	3.05838	2.37878	11.3034	15.393	12.3658	13.0142	6.87458
AhARF9-5	2.3124	3.14879	2.1729	4.35328	4.93727	12.5492	1.59523	0.0673039	1.17713	1.28253	1.12165	0.617715	1.8969	2.22035	2.38232	0.730976	0.863726	2.38885	2.0852	0.513724	0.0569879	0
AhARF10-1	0.433141	0.43647	0.433538	4.34573	3.92544	0.219576	0.0407387	1.37403	0.49603	0.673691	0.9473	0.631591	0.194426	0.741993	2.73968	1.54641	0.872805	5.2992	4.08662	1.47413	1.46841	0.845609
AhARF10-2	0.421318	0.45939	0.53941	4.21364	4.90523	0.46493	0.136403	1.16993	0.381357	0.813465	0.892854	0.410093	0.390044	1.09486	1.99411	2.03827	0.862272	5.04564	3.93847	2.13618	2.69343	1.21501
AhARF16-1	1.05434	1.44027	1.97135	1.6674	3.55505	4.29401	3.54872	0.43423	4.67127	0.687198	6.86664	20.8701	14.1646	9.93099	5.24712	5.14634	5.11476	6.75373	4.91496	3.47343	1.11371	0.443499
AhARF16-2	1.4014	1.94359	2.05901	1.22805	3.04168	2.9695	1.17291	0.0344486	2.82349	0.256653	4.08481	14.408	5.24598	4.79003	3.09908	4.91512	3.96911	3.83765	4.22816	3.62623	0.775852	0.49537
AhARF17-3	0.698226	0.824472	0.329651	2.03059	3.21014	0.675946	0.56658	0.155456	0.882926	0.179726	0.928086	0.706096	0.519726	0.940223	1.87629	1.44663	0.988519	1.54185	1.07255	1.11072	0.902323	1.12935
AhARF17-9	0.975517	1.05266	0.582561	2.48838	3.2662	0.885824	0.993022	0.0538048	1.4226	0.137552	0.960964	1.27838	0.546208	1.53731	2.41765	2.75574	1.70257	3.12067	1.94718	1.79514	0.959276	0.946167
AhARF18-2	0.58019	0.449986	0.473738	0.181955	0.798347	2.6586	1.81092	0.0908441	0.122134	0.206968	0.209039	0.149342	2.95412	1.55257	1.07494	2.82567	2.92596	0.400923	0.609051	0.77105	0.709315	0.686021
AhARF18-3	0.00994997	0.0305721	0.0767202	2.13056	3.20501	0.0761562	0	0	1.32177	2.0363	0.179196	0.33274	0.0705698	0.36293	0.100584	0.0220114	0.0269403	0.435572	0.690547	0.121178	0	0.0405757
AhARF18-4	3.62946	4.52869	3.61316	9.51013	9.40243	2.70192	2.66199	9.06899	7.30875	2.03173	1.38697	0.97902	1.55667	2.8218	2.91787	3.21578	2.64915	11.1456	8.24756	6.08017	5.28951	3.03405
AhARF18-5	0.178964	0.216803	0.248368	3.75128	4.83689	0.0496685	0.00388357	0	0.873417	0.0481843	0.137117	0.336051	0.013619	0.322966	0.194113	0.017743	0.0142724	0.990743	1.08852	0.471442	0.133111	0.0234917
AhARF18-6	0.0352199	0.0911502	0.0528317	3.18931	3.93797	0.108397	0.0162553	0	1.27655	0.0615156	0.0981208	0.19768	0	0.290467	0.16385	0.0084437	0.0068842	0.879088	0.91067	0.265925	0.0481537	0.0634636
AhARF18-7	0.0592066	0.0216472	0	0	0.0102593	0.00764073	0.00536057	0.469915	0.162938	1.71773	0.147787	0.0757013	0.112791	0.0771763	0.0334922	0.129678	0.0304883	0.0128836	0.00589715	0.0280753	0	0.0345948
AhARF18-8	5.76261	3.91168	0.715928	1.20164	3.25628	11.4832	5.24247	1.18421	0.346888	1.69193	3.0627	1.53724	12.21	6.73279	5.79842	8.96145	9.50886	2.07144	3.11148	4.05209	2.73531	1.94676
AhARF18-9	0.0450876	0.0797778	0.0710764	2.45297	2.98877	0.0532063	0.0138349	0.00782127	1.23684	1.68231	0.10726	0.235041	0.013354	0.420015	0.0713759	0	0.00383167	0.621056	0.757262	0.129084	0	0.0952194
AhARF19-1	2.31664	2.14876	1.56869	5.79115	5.6704	3.74803	2.25117	10.9082	4.12272	4.25843	3.54524	3.12962	4.71218	4.32436	3.29028	3.11519	2.09504	3.08475	3.42842	2.88515	2.85323	2.28294
AhARF19-2	3.22545	3.40275	2.52442	4.46377	5.15387	5.60097	2.65129	10.4118	6.55915	5.06782	8.50762	8.32295	9.60512	8.11495	5.82164	7.04215	7.24214	2.48292	3.29076	2.09672	1.40932	1.78168
AhARF19-3	2.45887	2.69529	2.28172	6.22268	6.32453	6.35652	4.39822	13.1575	7.95568	6.35412	4.29859	3.94742	9.44982	7.15747	3.01808	5.11912	4.8867	2.72674	3.5528	3.16086	3.40878	4.35672
AhARF19-4	5.85569	5.39471	5.31589	7.25985	7.87948	8.78546	2.3796	15.7003	10.7096	5.48616	14.7817	14.5564	13.8932	11.5122	9.06662	10.765	11.2295	3.18053	3.43712	2.10175	1.58812	1.39311
AhARF19-5	2.53807	3.05474	2.35825	5.49233	7.24594	2.40269	2.27747	8.35349	3.89305	3.1987	1.11529	0.741315	0.960317	1.88949	1.97643	1.95675	2.04689	6.76397	4.86501	3.77185	4.93577	4.31863

## Sheet: S7
Table S7 The properties and sequence analyses of AhARF6 proteins.
Gene	Number of amino acids/aa	Molecular weight/ku	Theoretical pI	Instability index	Aliphatic index	Grand average of hydropathicity (GRAVY)	Subcellular localization prediction
AhARF6-1	885	99033.4	6.19	63.14	74.11	-0.508	Nuclear
AhARF6-2	923	101629	6.11	66.86	74.26	-0.42	Nuclear
AhARF6-3	810	89833.1	6.19	68.54	76.57	-0.46	Nuclear
AhARF6-4	909	101673	6.07	61.49	72.7	-0.488	Nuclear
AhARF6-5	902	99379.5	6.14	66.98	72.86	-0.458	Nuclear
AhARF6-6	838	92977.6	6.27	69.08	74.58	-0.431	Nuclear
Average		97421	6.16167	66.015	74.18	-0.460833

## Sheet: S8
Table S8 Motif sequence of AhARF6 proteins.
Motif	Motif sequence
Motif 1	QPRRHLLTTGWSVFVSSKKLVAGDSWFLRGENGZLRVGIR
Motif 2	DYSQQPPVQELVAKDLHGNEWKFRHIYRG
Motif 3	KSLYSELWHACAGPLVSLPRVGSRWYFPQGHSEQVTkASTN
Motif 4	FCKTLTASDTSTHGGFSVPRRAAEECFPP
Motif 5	PKILCRWNVKLHADPETDEVYAQITLLP
Motif 6	VISSQSMHJGVLAEAAHAAATNSPFTVFYNPR
Motif 7	YTDRENDVMLVGDDPWEEFCNMVKRIKILWPNSPWRSLKVTWDEP
Motif 8	WPNSPWRSLKVTWDEP
Motif 9	WSVGMRFKMRFETEDSSRRRW
Motif 10	GRAIDLTRLSSYDELRSELERMFGIEGEL

## Sheet: S9
Table S9 The expression level of AhARF6 in the pod of ZP06, H8107, H103 and A.mon from Transcriptome data.
Gene_name	7500-shell.1	7500-shell.2	7500-shell.3	7500-seed.1	7500-seed.2	7500-seed.3	ZP06-shell.1	ZP06-shell.2	ZP06-shell.3	ZP06-seed.1	ZP06-seed.2	ZP06-seed.3	H103-shell.1	H103-shell.2	H103-shell.3	H103-seed.1	H103-seed.2	H103-seed.3	H8107-shell.1	H8107-shell.2	H8107-shell.3	H8107-seed.1	H8107-seed.2	H8107-seed.3	A.mon-shell.1	A.mon-shell.2	A.mon-shell.3	A.mon-seed.1	A.mon-seed.2	A.mon-seed.3
AhARF6-1	16.4652	24.5065	20.4858	4.47771	8.41475	6.44623	13.6208	20.1509	16.8858	6.59558	4.12745	5.36151	35.3428	26.4848	30.9138	4.55176	4.22068	4.38622	20.6367	19.5809	20.1088	6.39504	9.02823	7.71164	16.7892	11.7595	14.2744	3.50699	4.69804	4.10251
AhARF6-2	17.6568	20.1595	18.9082	5.87351	7.12382	6.49867	14.6471	15.7912	15.2192	5.47638	4.69762	5.087	21.9458	17.3227	19.6343	4.34041	5.47959	4.91	14.9293	15.765	15.3471	4.47586	4.96158	4.71872	0	0.534972	0.267486	0	0	0
AhARF6-3	20.2097	24.1	22.1548	5.41609	6.78342	6.09975	25.2101	33.677	29.4435	7.80206	4.77035	6.28621	37.3451	29.7382	33.5416	5.35637	6.27363	5.815	31.5202	32.9979	32.2591	7.3338	7.66852	7.50116	14.0436	18.5188	16.2812	3.49259	3.93586	3.71423
AhARF6-4	12.1879	15.7109	13.9494	4.83259	7.49076	6.16168	10.8654	16.9324	13.8989	6.0432	5.46425	5.75373	24.0788	17.1502	20.6145	3.63699	5.28975	4.46337	18.2578	18.5966	18.4272	5.83456	6.3245	6.07953	13.6102	12.3068	12.9585	3.65873	2.94538	3.30206
AhARF6-5	17.9254	18.5104	18.2179	4.33878	5.43416	4.88647	18.4811	18.0781	18.2796	3.90307	4.45913	4.1811	22.9106	19.6677	21.2892	3.12112	3.91772	3.51942	14.5565	17.4482	16.0023	3.36095	3.90265	3.6318	0	0.707992	0.353996	0	0.016683	0.0083415
AhARF6-6	10.7302	11.7871	11.2586	4.53524	5.24116	4.8882	22.6609	28.2934	25.4772	7.14876	6.23559	6.69217	27.9455	24.364	26.1547	4.34735	5.58132	4.96434	15.6957	18.3718	17.0337	5.01714	6.39598	5.70656	10.1476	14.2407	12.1942	2.86904	2.69341	2.78123

## Sheet: S10
Table S10 Expression analysis of AhARF6 genes in response to treatment with the hormone NAA in peanut
Gene		0h	2h	4h	8h	12h
ARF6-1	H103-leaf	26.6216	27.1568	30.5275	26.8897	30.45
		26.7869	27.1567	30.2501	28.5004	33.66
		26.724	27.243	30.2949	26.5022	29.65
	Actin	24.3011	25.1019	27.5468	20.9128	22.36
		24.4914	25.0109	27.1941	23.2421	22.74
		24.5106	24.4806	27.1787	0	22.19
	H103-branch	26.1833	26.8929	26.8661	26.5779	26.888
		26.0867	26.4114	26.6532	26.8846	27.1166
		26.6032	26.548	27.1477	26.8657	26.8337
	Actin	24.0579	24.2056	23.7547	25.2859	22.864
		24.0749	24.2475	23.6037	26.819	22.8758
		28.5976	24.2519	23.5875	0	23.1367
	H103-stem	29.0162	26.1321	28.7223	27.4096	27.9004
		28.5073	26.4717	28.9187	27.6556	27.5034
		28.7472	26.2245	28.7156	28.029	27.686
	Actin	26.032	24.0714	26.43	26.7618	21.8691
		25.9135	24.1213	26.3977	26.5955	22.3209
		26.2123	24.1342	26.3413	26.4859	22.463
	H103-root	25.6885	26.0976	26.6769	26.0249	27.3822
		25.5139	26.0664	26.6955	26.6083	27.4682
		25.7423	26.0243	26.6319	26.8407	27.5233
	Actin	20.1854	21.1338	21.4632	20.4698	19.5809
		20.5555	21.3124	21.1433	20.2507	19.8204
		20.3929	21.272	21.0491	20.5928	19.5339
	A.mon-leaf	28.6955	27.4073	29.0293	27.7743	31.4294
		28.2518	27.5556	28.9385	28.4201	31.1083
		28.2867	27.3677	29.0937	28.5392	31.2121
	Actin	24.7665	24.5604	29.9501	25.6295	23.071
		24.8637	23.5242	0	25.9571	23.7622
		25.0767	24.1357	0	25.5335	23.4721
	A.mon-branch	31.0952	25.6458	26.5774	26.4339	28.934
		31.7156	25.6383	26.9019	26.6324	29.3723
		31.2455	25.7053	27.2886	27.3314	29.4787
	Actin	28.7834	23.9768	24.647	23.5656	24.4056
		29.0608	23.9075	24.6262	23.5328	24.3092
		29.1414	24.154	24.6344	23.4378	24.1732
	A.mon-stem	27.9624	27.1119	25.3049	29.846	30.3729
		27.985	27.2474	25.7011	29.778	30.8852
		28.2283	27.2758	25.159	29.8019	30.8176
	Actin	27.697	24.5862	21.8835	28.0007	25.5709
		27.5711	24.7503	22.0365	27.9401	25.5018
		27.7501	24.9017	22.0959	27.8431	26.8616
	A.mon-root	26.5892	26.0891	28.3272	27.6165	31.0659
		26.7867	26.1353	28.1181	27.3296	30.9998
		26.2487	26.3753	28.3016	27.6379	30.8344
	Actin	20.9176	20.6014	22.3264	20.8937	22.8338
		21.1648	20.4638	22.2708	20.91	24.4656
		21.6439	20.6488	22.3989	21.6027	24.4411
ARF6-2	H103-leaf	26.9301	29.1277	30.2795	30.9351	29.029
		27.1199	29.4699	29.127	32.1534	28.8729
		26.9197	29.065	25.1451	32.0831	28.989
	Actin	22.8137	24.5475	27.0517	22.8444	22.4249
		23.3818	24.5461	27.5574	23.057	22.6833
		23.3923	24.7554	27.0056	23.1546	22.7218
	H103-branch	26.6287	28.9477	30.3546	28.3565	30.4143
		27.7133	29.9926	29.6329	28.3045	35.7394
		27.1224	28.306	30.0285	30.006	34.0223
	Actin	22.9206	24.1869	22.9691	23.7843	23.9386
		23.8568	23.9422	22.7959	23.9814	24.0481
		22.8812	23.5722	23.151	23.5452	23.4921
	H103-stem	28.0232	30.0114	30.2772	33.8446	33.5143
		27.5017	28.4548	31.3997	33.9675	30.713
		27.566	31.2877	31.0173	33.0605	31.8983
	Actin	24.4403	25.9504	25.7717	25.6137	22.3439
		25.1786	26.1156	25.6418	32.9346	22.3594
		24.6113	24.6799	26.2556	26.4337	22.242
	H103-root	28.7434	31.6207	29.7123	33.7586	29.0294
		29.6646	28.2838	28.9539	32.6883	29.8116
		28.7142	29.1233	29.1174	33.2398	29.8357
	Actin	19.8004	20.3292	20.4306	20.38	19.9566
		20.138	20.4638	20.1889	20.3963	20.0471
		20.1126	19.7386	20.3307	20.3531	19.6136
	A.mon-leaf	29.072	33.1685	30.1474	35.584	31.6071
		28.6929	31.1934	29.6144	35.8235	31.8822
		28.4428	32.7878	29.3141	35.94	33.2349
	Actin	23.9646	23.0816	28.7284	24.0733	23.1891
		23.7575	23.0332	28.8917	24.0733	23.3943
		23.3186	23.1854	28.8674	24.0733	22.67
	A.mon-branch	30.8166	32.2575	36.4511	38.9158	32.7853
		33.1289	34.5249	33.7523	39.2005	33.8148
		30.2256	34.4233	32.9881	36.0611	33.2349
	Actin	28.1518	22.5631	23.935	23.9034	23.7334
		28.5715	22.4253	23.6896	23.9034	24.5639
		28.468	22.7102	23.9519	23.9034	23.5037
	A.mon-stem	32.0074	30.3193	29.9664	37.3237	30.0706
		27.8477	28.0353	29.5767	36.2579	29.9299
		31.5087	28.7846	29.0253	35.6163	30.7703
	Actin	27.5616	23.2884	21.1267	27.7156	22.6175
		26.6219	23.5293	21.2908	27.7454	23.1358
		27.5109	23.5082	21.2327	27.7357	22.7258
	A.mon-root	27.4554	32.7365	30.2913	39.9957	33.4101
		25.2671	32.4964	30.1038	32.8011	35.5468
		29.8729	31.9032	30.1732	33.2562	33.385
	Actin	22.0156	19.2581	21.8587	20.8746	20.764
		20.5732	19.2452	21.7237	21.3032	20.8698
		20.2975	18.9102	21.7466	21.1235	20.3892
ARF6-3	H103-leaf	24.1372	28.8249	29.9606	27.3697	27.1647
		24.4126	28.5701	29.9597	27.641	27.5628
		24.0318	28.4426	29.823	27.6665	26.767
	Actin	23.6537	25.457	29.0123	24.2837	24.6528
		24.0617	25.4055	28.508	24.7932	24.9628
		23.348	25.5659	28.791	24.3311	24.5371
	H103-branch	24.3218	34.0733	28.4542	25.0266	24.2949
		24.2006	33.3718	28.1263	24.8605	24.7707
		24.3698	33.3691	28.2949	25.9988	24.3766
	Actin	24.7118	28.9914	27.1117	24.7161	25.2823
		24.6022	29.136	26.8205	24.2619	25.2537
		24.4891	29.1691	27.0665	24.0962	25.3262
	H103-stem	24.0309	33.8119	25.7531	25.2341	25.3344
		24.2038	33.1389	25.1947	25.0673	25.2134
		24.1328	35.347	25.3444	25.1328	25.5238
	Actin	24.2371	28.3692	24.0238	26.2377	23.4428
		24.3143	28.6039	24.081	26.2581	23.5343
		24.1234	29.0727	24.137	26.1422	23.7041
	H103-root	24.0784	28.8471	26.0776	23.8743	24.8811
		24.0477	29.0091	25.9041	23.6874	24.6187
		23.9796	28.7747	25.7854	23.9026	24.4195
	Actin	20.3716	22.6316	21.85	20.7968	21.3488
		20.4349	22.4498	21.624	21.1233	21.2811
		20.6825	22.4679	21.7675	20.9597	21.3571
	A.mon-leaf	29.1866	32.0565	30.7251	25.4046	26.2077
		29.0512	38.1869	30.712	25.0645	25.4242
		28.487	36.4242	29.7755	25.065	25.7063
	Actin	27.9094	31.6281	27.262	23.8773	24.5506
		28.2422	31.5893	26.5193	23.4961	24.6276
		27.9905	30.309	26.7585	23.8479	24.732
	A.mon-branch	26.3659	28.3343	29.1597	25.1892	25.3244
		26.3828	28.227	28.5225	25.1889	25.2327
		26.1217	28.8754	28.4339	25.4085	25.294
	Actin	27.2966	26.5137	26.7638	24.3342	26.1622
		27.1522	26.7149	26.5146	24.2944	26.3195
		27.2944	27.2098	26.9053	24.3249	25.7672
	A.mon-stem	26.3053	28.9244	25.8012	26.9672	23.8038
		26.0132	28.3583	25.2541	26.9049	23.9737
		25.9534	29.4426	25.4397	27.163	24.0514
	Actin	28.2257	26.9297	23.8925	28.5482	23.758
		28.0606	27.1681	23.5678	28.4568	23.5159
		28.1206	26.8627	23.6769	28.3158	23.6353
	A.mon-root	22.9211	29.8713	26.4818	25.7419	25.6895
		23.1972	29.6846	26.3873	25.3782	25.6288
		23.0756	29.394	26.1586	25.5193	25.5434
	Actin	20.3333	24.4583	22.8313	21.9462	22.1764
		19.9823	24.3545	22.5048	21.9651	22.1203
		19.9943	24.4331	22.783	21.7481	22.0838
ARF6-4	H103-leaf	31.9377	34.2734	30.3248	30.744	31.8941
		32.3824	34.7488	30.1511	30.7942	32.9282
		31.9228	34.7929	30.05	30.9663	33.0839
	Actin	23.9629	25.6219	27.7549	23.2669	23.8618
		23.7924	25.752	28.0175	23.3457	23.6725
		23.9	25.6423	28.2124	23.3412	23.8022
	H103-branch	32.5813	35.3019	34.167	32.3849	30.3983
		32.6178	35.1683	33.5626	31.1557	30.2437
		32.8798	35.6411	35.0621	31.5101	30.7018
	Actin	25.5665	29.3445	26.7854	24.001	24.0798
		25.4844	29.0143	27.1018	23.8482	24.2883
		25.3094	29.408	26.737	23.8021	24.3454
	H103-stem	31.4236	36.5512	33.0371	34.6805	29.8721
		31.4111	35.6732	34.3227	34.5955	30.1181
		31.3663	35.0685	34.2737	35.2831	29.92
	Actin	25.9992	28.6296	24.4234	26.9803	22.8017
		27.0228	28.5338	24.1766	26.7873	22.7257
		27.0344	28.6378	24.143	27.0046	22.7606
	H103-root	31.9095	36.3221	34.9676	35.0774	28.7069
		32.2187	34.27	36.3057	35.5408	29.1212
		32.8114	34.3566	35.9387	32.4121	28.5858
	Actin	21.5723	22.312	22.3011	20.5148	20.4605
		21.1367	22.3099	22.3122	20.7468	21.3291
		21.094	22.4581	22.1427	20.7942	20.5435
	A.mon-leaf	33.2542	35.2961	31.257	31.86	29.6485
		34.333	34.0749	32.0635	32.1136	29.2633
		35.4226	34.38	31.5664	31.9299	29.9439
	Actin	28.0847	27.1402	25.5095	24.1759	23.7222
		28.2932	26.9505	25.2617	23.666	23.5116
		28.0891	27.0064	25.2951	23.5443	23.8939
	A.mon-branch	34.9598	34.2444	33.7114	33.3105	31.8428
		34.0957	33.8232	35.0827	33.5694	30.7671
		34.3323	34.0119	34.8927	34.4658	31.9785
	Actin	27.898	25.2035	25.3523	24.2682	24.4033
		27.6991	25.2887	25.6826	24.3493	25.4545
		27.9276	25.5748	25.5599	24.2869	25.3493
	A.mon-stem	34.0003	31.7197	31.6802	33.3522	29.1606
		33.7686	31.4601	31.3137	33.2597	29.6494
		33.1922	31.7068	31.5208	33.4496	29.4699
	Actin	28.9859	25.7369	22.9667	29.6304	23.0174
		29.0843	26.0943	22.9099	28.353	22.8033
		29.0248	25.9662	22.9182	28.3991	23.1855
	A.mon-root	31.6792	36.124	33.5527	33.5235	32.8669
		32.2371	36.4532	32.8291	33.2891	32.9832
		32.0736	35.4948	32.6796	33.7839	32.5046
	Actin	20.908	24.1951	22.1268	21.4195	21.0381
		20.8229	24.2393	22.339	21.6004	21.4878
		20.7388	24.1115	21.9616	21.4637	21.3912
ARF6-5	H103-leaf	26.4574	26.6565	30.6588	26.1997	26.6937
		26.1913	27.0435	30.9162	26.378	26.1504
		26.175	26.617	30.6264	26.4405	25.8348
	Actin	23.1131	23.7569	27.1724	20.9614	22.6106
		23.2294	24.3866	26.7065	21.5377	22.3449
		23.1736	1.15	1.1	21.133	22.6179
	H103-branch	26.7084	0.36	1.36	28.2067	28.0304
		26.2983	0.2	0.87	28.4291	28.1136
		26.5039	0	0.54	28.2945	27.9542
	Actin	23.0839	0.09	0.17	24.0102	23.2558
		22.7115	22.4826	21.6401	24.0834	23.6077
		22.899	22.8592	22.5744	23.295	23.1117
	H103-stem	29.277	26.1052	29.5293	28.6171	26.9851
		29.9017	25.9122	30.2717	28.9631	26.8863
		29.1326	25.8175	30.2935	29.0424	27.1038
	Actin	25.2063	22.599	25.1536	24.6036	21.6696
		24.9781	23.1485	25.4035	25.1667	21.9446
		24.6422	23.0552	25.5687	25.0039	21.3531
	H103-root	25.6418	26.4805	26.6168	26.6794	26.6256
		25.4169	26.1852	26.95	26.1975	26.396
		25.5529	25.7793	26.6598	26.1547	26.8539
	Actin	19.4501	20.03	20.247	19.6044	19.5418
		19.4388	19.4979	20.0904	19.3339	19.6561
		19.1821	20.0497	20.3546	19.6357	19.3214
	A.mon-leaf	31.1634	33.6806	30.8217	32.109	31.8322
		31.9864	36.2287	30.8476	33.5437	30.5727
		31.1774	36.8596	30.0826	33.5085	31.9593
	Actin	23.6257	23.4659	28.6846	25.4152	23.3333
		24.2945	23.1768	28.6816	24.7598	23.5682
		23.5874	23.0887	29.2905	24.0665	23.1026
	A.mon-branch	34.474	40.6544	35.3559	35.4455	39.6606
		34.4953	35.802	34.3333	36.5622	36.0413
		34.4266	35.0181	38.1744	34.1887	33.9483
	Actin	27.9927	23.0256	23.6906	23.1291	23.9292
		27.7	22.8004	23.663	22.6573	24.0976
		27.8875	22.8766	23.3285	22.3907	23.7921
	A.mon-stem	33.1419	31.0683	31.2357	32.8913	31.3007
		33.2932	30.5835	31.0418	32.4909	31.0599
		33.2354	30.8322	31.436	34.2588	30.2145
	Actin	26.5594	23.7529	20.4725	27.5251	22.6913
		26.5646	23.4352	20.1969	27.3961	22.7705
		26.4836	23.6885	20.7748	27.063	22.5448
	A.mon-root	32.9361	38.4531	32.7949	35.0553	34.3898
		33.0864	37.9147	32.4204	35.7582	35.5435
		35.2007	40.0943	33.5802	37.8751	34.4752
	Actin	20.2705	19.4626	20.8731	19.7461	20.7423
		20.1877	19.3824	21.9384	20.2711	20.9109
		20.0379	19.7192	21.0936	20.1877	20.233
ARF6-6	H103-leaf	23.0936	27.5576	31.4886	27.3819	26.7985
		22.6625	27.8379	30.9375	27.5234	26.0715
		22.9004	27.7708	31.5488	27.147	26.3754
	Actin	23.405	26.1933	29.5489	25.1722	25.2853
		23.575	26.1909	29.451	25.353	25.2431
		23.6624	26.2516	29.6729	24.9726	25.3176
	H103-branch	23.1831	34.3042	27.8176	24.3547	24.3143
		22.8531	34.4738	27.7666	23.969	23.8747
		22.5612	34.5349	27.7441	24.0443	24.2081
	Actin	24.9159	30.0093	27.6104	25.3634	25.7874
		25.0087	29.9179	27.8764	24.6439	25.7166
		24.5241	29.7909	27.5808	24.7627	25.5499
	H103-stem	23.3102	31.9537	24.7362	24.888	24.412
		22.6062	32.481	24.9221	25.12	24.5574
		23.3177	32.2995	24.94	24.9828	24.5948
	Actin	24.8457	29.1493	24.7216	26.9789	24.3509
		24.8162	29.1748	25.4142	27.0645	24.4631
		24.0708	29.2948	25.2599	26.7226	24.1883
	H103-root	22.3876	27.7262	25.2677	23.4173	24.5334
		22.7169	27.5876	25.3394	23.4907	24.5857
		23.1075	27.7998	25.2757	23.604	24.1848
	Actin	20.384	23.2315	22.2458	21.5967	22.1138
		20.5987	23.0423	22.8668	21.8467	22.354
		20.1837	23.1739	23.1938	21.4959	22.2946
	A.mon-leaf	28.1981	30.0317	26.087	24.4691	24.3984
		28.3006	30.1847	26.1702	24.3092	24.2499
		27.7176	30.2409	26.343	24.6427	24.6293
	Actin	28.0544	27.5553	26.3583	24.2653	24.6909
		27.4073	27.2358	26.3003	24.3788	24.5876
		27.3843	27.5009	26.3152	24.2699	24.595
	A.mon-branch	24.7495	25.3912	24.5392	24.2659	24.5823
		24.7072	25.939	24.5358	24.2945	24.5213
		24.6143	25.4936	25.7587	24.2209	24.3922
	Actin	26.9422	25.9239	25.9763	25.0169	26.4534
		26.7773	26.1679	25.5179	24.6648	26.6731
		27.009	25.9243	25.8245	24.8182	26.7834
	A.mon-stem	25.045	26.0832	23.7245	26.7399	23.3554
		24.3081	26.2672	23.6107	26.6498	23.4583
		24.0967	26.3481	23.901	26.5246	23.3453
	Actin	27.7665	26.5307	23.9246	29.0376	24.203
		28.2102	26.5434	23.8958	29.2074	24.488
		28.2044	26.5843	24.0166	28.8827	24.3501
	A.mon-root	22.0281	28.2042	26.0289	25.2103	25.1895
		22.1113	28.0963	26.1159	24.9745	25.0447
		21.4789	28.1235	26.1059	24.8939	25.0435
	Actin	20.1384	25.0833	23.3366	22.8411	22.8412
		20.0694	24.7541	23.3797	22.8357	22.7936
		20.1774	24.6984	23.4362	22.6127	23.1397
